# Supplementary material for: Synthesis of hyperpolarizable biomaterials at molecular level based on pyridinium–chitosan complexes
Source: Royal Society of Chemistry journal article supplement (doi:10.1039/c5ra09397j), 2015-01-01

ELECTRONIC SUPPLEMENTARY INFORMATION

## Synthesis of Hyperpolarizable Biomaterials at Molecular Level based on Pyridinium-Chitosan Complexes

*Antonio Franconetti,<sup>a</sup> Lidia Contreras-Bernal,<sup>a</sup> Rafael Prado-Gotor<sup>b</sup> and Francisca Cabrera-Escribano<sup>\*,a</sup>*

<sup>a</sup>Departamento de Química Orgánica, Facultad de Química, Universidad de Sevilla, C/ Profesor García González 1, 41012 Sevilla, Spain

<sup>b</sup>Departamento de Química Física, Facultad de Química, Universidad de Sevilla, C/ Profesor García González 1, 41012 Sevilla, Spain

\* [fcabrera@us.es](mailto:fcabrera@us.es)

### Contents:

1. Synthesis and spectral data of pyrylium salts (**1-6**)
2. DSC-TGA thermogram for starting material **CS 1** (**Fig. S1**).
3. Calculation of DS value from DS1 and DS2 parameters (**Table S1**).
4. Theoretical calculations by B3LYP/6-31G (d,p) method of distances and dihedral angles for some pyridinium tetrafluoroborates (**Table S2**).
5. Cartesian coordinates and energies for pyridinium complexes (**7-12**)
6. Scheme of calculated tripod-type interaction CH–anion for compound **9** (distance in Å) at two points of view (**Fig. S2**).
7. Molecular orbital and energies for HOMO-LUMO of NLO-phore **10**. (**Fig. S3**)
8. <sup>1</sup>H, <sup>19</sup>F, diffusion experiment and <sup>13</sup>C NMR spectra of new pyridinium compounds. (**Fig. S4– S33**)

## 1. Synthesis of spectral data of pyrylium compounds (1-6)

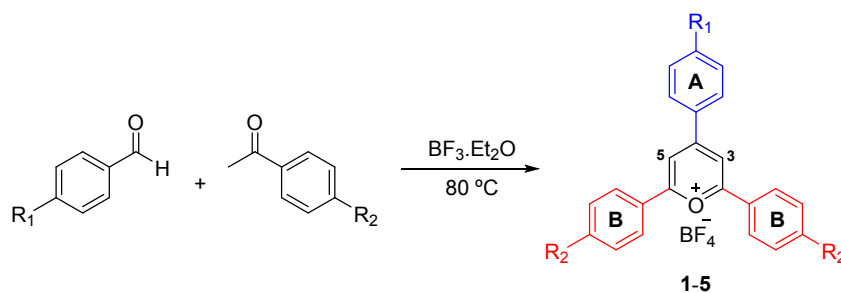

| Compound | R <sub>1</sub> | R <sub>2</sub> | Yield (%) |
|----------|----------------|----------------|-----------|
| 1        | H              | H              | 34        |
| 2        | H              | F              | 38        |
| 3        | Ph             | F              | 74        |
| 4        | Ph             | H              | 70        |
| 5        | Ph             | Me             | 25        |
| 6        | OMe            | F              | 11        |

### General Procedure

BF<sub>3</sub>·Et<sub>2</sub>O (3.1 equiv.) was added dropwise under a N<sub>2</sub> atmosphere to a solution of *p*-substituted benzaldehyde (1 equiv.) and *p*-substituted acetophenone (3 equiv.). The mixture was heated to 80 °C until the reaction was complete, monitored by TLC (1:4 EtOAc–hexane). The residue was eventually treated with EtOH or Et<sub>2</sub>O. Crystallization from acetone gave the corresponding pure pyrylium tetrafluoroborate.<sup>49</sup>

### 2,4,6-Triphenylpyrylium tetrafluoroborate (1)

<sup>1</sup>H NMR (500 MHz, DMSO-*d*<sub>6</sub>): δ = 9.17 (s, 2H, H-3 and H-5), 8.60 (d, 6H, *J* = 7.5 Hz, H-2a, 6a, 2b,6b, 2c and 6c), 7.88 (t, 3H, *J* = 7.5 Hz, H-4a, 4b and 4c), 7.81 (t, 6H, *J* = 8.0 Hz, H-3a, 5a, 3b, 5b, 3c and 5c).

### 2,6-Di-(4-fluorophenyl)-4-phenylpyrylium tetrafluoroborate (2)

<sup>1</sup>H NMR (500 MHz, DMSO-*d*<sub>6</sub>): δ = 9.14 (s, 2H, H-3 and H-5), 8.69 (dd, 4H, *J* = 5.2, *J* = 9.0 Hz, H-2b, 6b, 2c and 6c), 8.59 (d, 2H, *J* = 7.4, H-2a and 6a), 7.88 (t, 1H, *J* = 7.5, H-4a), 7.79 (t, 2H, *J* = 8.1, H-3a and 5a), 7.66 (t, 4H, *J* = 8.8, H-3b, 5b, 3c and 5c)

### 4-Biphenyl-2,6-di-(4-fluorophenyl)pyrylium tetrafluoroborate (3)

$^1\text{H}$  NMR (500 MHz, DMSO- $d_6$ ):  $\delta$  = 9.19 (s, 2H, H-3 and H-5), 8.73 (d, 2H,  $J$  = 8.7 Hz, H-2a and 6a), 8.70 (dd, 4H,  $J$  = 5.3,  $J$  = 9.0 Hz, H-2b, 6b, 2c and 6c), 8.12 (d, 2H,  $J$  = 8.6 Hz, H-3a and 5a), 7.94 (d, 2H,  $J$  = 7.2 Hz, H-2d and 6d), 7.67 (t, 4H,  $J$  = 8.8, H-3b, 5b, 3c and 5c), 7.58 (t, 2H,  $J$  = 7.2 Hz, H-3d and 5d), 7.51 (t, 1H,  $J$  = 7.4 Hz, H-4d).

### 4-Biphenyl-2,6-diphenylpyrylium tetrafluoroborate (4)

$^1\text{H}$  NMR (500 MHz, DMSO- $d_6$ ):  $\delta$  = 9.21 (s, 2H, H-3 and H-5), 8.75 (d, 2H,  $J$  = 8.6 Hz, H-2a and 6a), 8.61 (d, 4H,  $J$  = 8.2, H-2b, 6b, 2c and 6c), 8.12 (d, 2H,  $J$  = 8.6 Hz, H-3a and 5a), 7.94 (d, 2H,  $J$  = 8.1 Hz, H-2d and 6d), 7.88 (t, 2H,  $J$  = 7.4 Hz, H-3d and 5d), 7.81 (t, 4H,  $J$  = 7.9 Hz, H-3b, 5b, 3c and 5c), 7.58 (t, 2H,  $J$  = 7.2 Hz, H-4b and 4c), 7.52 (t, 1H,  $J$  = 7.3 Hz, H-4d).

### 4-Biphenyl-2,6-di-(4-methylphenyl)pyrylium tetrafluoroborate (5)

$\text{BF}_3 \cdot \text{Et}_2\text{O}$  (812  $\mu\text{L}$ , 6.58 mmol) was added dropwise under  $\text{N}_2$  atmosphere to a solution of biphenyl-4-carboxaldehyde (500 mg, 2.74 mmol) and 4-methylacetophenone (732  $\mu\text{L}$ , 5.49 mmol) in toluene (2 mL). The mixture was heated to 80°C until the reaction was complete (4 h) monitoring by TLC (1:4 EtOAc-hexane). The residue was washed with EtOH (5 mL). Crystallization from acetone gave compound **5** (282 mg, 25 %) as an orange solid; m.p. (decomp): 291–292 °C; IR  $\nu_{\text{max}}$  1597, 1481, 1458, 1002, 840, 817, 765, 727 and 687  $\text{cm}^{-1}$ ; UV-vis (AcOH/H<sub>2</sub>O/MeOH):  $\lambda_{\text{max}}$  421 and 288 nm; Fluorescence (AcOH/H<sub>2</sub>O/MeOH):  $\lambda_{\text{em}}$  535 nm;  $^1\text{H}$  NMR (500 MHz, DMSO- $d_6$ ):  $\delta$  9.09 (2H, s), 8.70 (2H, d,  $J$  8.6 Hz), 8.49 (4H, d,  $J$  8.3 Hz), 8.09 (2H, d,  $J$  8.5 Hz), 7.92 (2H, d,  $J$  8.6 Hz), 7.61 (4H, d,  $J$  8.3 Hz), 7.58 (2H, t,  $J$  7.8 Hz), 7.51 (1H, t,  $J$  7.3 Hz) and 2.52 (6H, s);  $^{13}\text{C}$  NMR (125 MHz, DMSO- $d_6$ ):  $\delta$  169.1, 166.6, 146.3, 146.1, 138.1, 131.4, 130.7, 130.5, 129.2, 129.1, 128.7, 127.8, 127.3, 126.6, 113.9 and 21.5;  $^{19}\text{F}$  NMR (470 MHz, DMSO- $d_6$ ):  $\delta$  -148.32 ( $^{10}\text{BF}_4^-$ ) and -148.37 ( $J_{\text{F,B11}}$  1.1 Hz,  $^{11}\text{BF}_4^-$ ); CIHRMS:  $m/z$  414.1983, calcd for  $\text{C}_{31}\text{H}_{26}\text{O}^+ + \text{H}$ : 414.1984.

### 2,6-Di-(4-fluorophenyl)-4-(4-methoxyphenyl)pyrylium tetrafluoroborate (6)

$^1\text{H}$  NMR (500 MHz, DMSO- $d_6$ ):  $\delta$  9.02 (s, 2H, H-3 and H-5), 8.70 (d, 2H,  $J$  = 9.1 Hz, H-2a and 6a), 8.64 (dd, 4H,  $J$  = 5.3,  $J$  = 8.9 Hz, H-2b, 6b, 2c and 6c), 7.64 (t, 2H,  $J$  = 8.9 Hz, H-3b, 5b, 3c and 5c), 7.33 (d, 2H,  $J$  = 9.1 Hz, H-3a and 5a), 4.00 (s, 3H, OCH<sub>3</sub>);

## 2. Figure S1. DSC-TGA thermogram for starting material CS 1

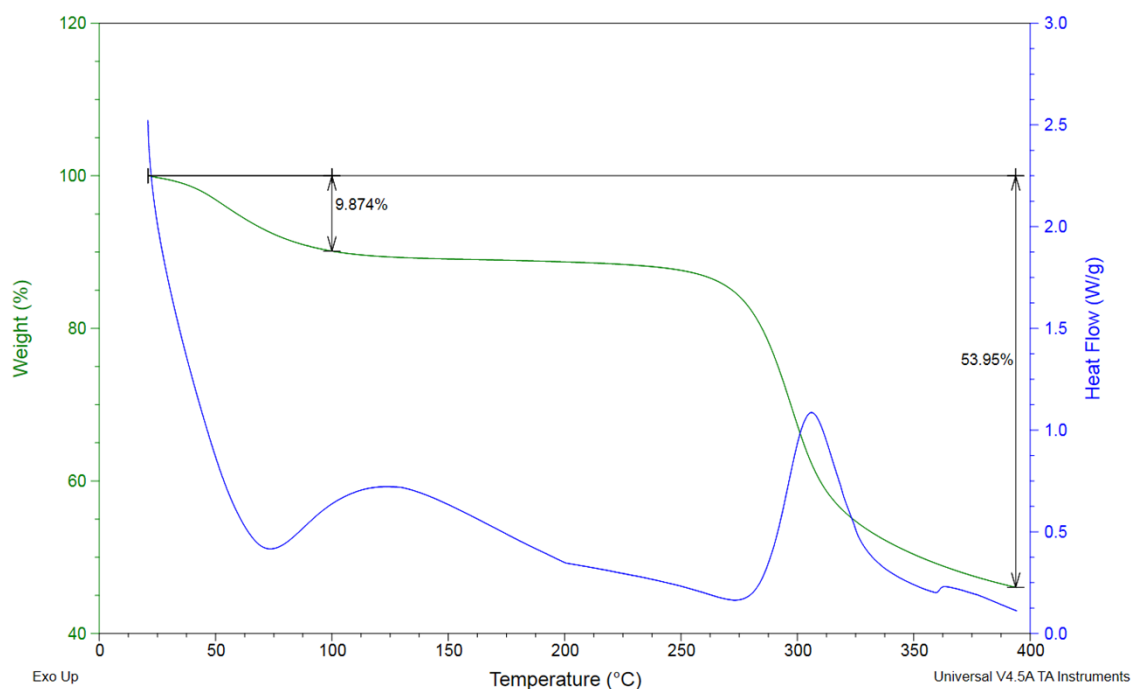

## 3. Calculation of DS value from DS<sub>1</sub> and DS<sub>2</sub> parameters (Table S1).

The second form to calculate the DS value is as followed:

$$\text{DS (\%)} = (\text{DS}_1 + \text{DS}_2)/2$$

$$\text{and DS}_1 \text{ (\%)} = I_{\text{Ar}} / (n \times I_{\text{H1}}) \times 100; \text{DS}_2 \text{ (\%)} = I_{\text{Ar}} / (n \times I_{\text{H2}}) \times 100$$

where  $I_{\text{Ar}}$  is the integral value relative to aromatic protons of pyrylium moieties,  $n$  is the number of aromatic protons and  $I_{\text{H1}}/ I_{\text{H2}}$  are the peaks areas of H-1 and H-2 protons respectively of chitosan polymer

**Table S1**

| Compound | R <sub>1</sub> | R <sub>2</sub> | DS (%)                                                        | Yield (%)                                                 |
|----------|----------------|----------------|---------------------------------------------------------------|-----------------------------------------------------------|
| 7        | H              | H              | 1.4 (0.9 <sup>a</sup> , 2.2 <sup>b</sup> , 4.3 <sup>c</sup> ) | 97 (90 <sup>a</sup> , 65 <sup>b</sup> , 94 <sup>c</sup> ) |
| 8        | H              | F              | 1.4 (3.0 <sup>c</sup> )                                       | 87 (77 <sup>c</sup> )                                     |
| 9        | Ph             | F              | 1.2                                                           | 76                                                        |
| 10       | Ph             | H              | 0.5                                                           | 70                                                        |
| 11       | Ph             | Me             | 1.1                                                           | 99                                                        |
| 12a      | OMe            | F              | 0.4                                                           | 73                                                        |

<sup>a</sup> Corresponding to compound **13** from **CS 2**; <sup>b</sup> Corresponding to compound **14** from **CS 3**; <sup>c</sup> synthesized at pH 5.1

**4. Table S2.** Theoretical calculations by B3LYP/6-31G (d,p) method of distances and dihedral angles for some pyridinium tetrafluoroborates.

| Compound | $R_{B\cdots N}$ (Å) | $R_{F\cdots C(5)}$ (Å) | $R_{F\cdots H(5)}$ (Å) | $R_{F\cdots H(1)}$ (Å) | $R_{F\cdots H(6)}$ (Å) | $R_c$ (Å) | $\phi_2$ (°) | $\phi_4$ (°) | $\phi_6$ (°) |
|----------|---------------------|------------------------|------------------------|------------------------|------------------------|-----------|--------------|--------------|--------------|
| 7        | 3.777               | 3.540                  | 4.218                  | 2.343                  | 2.146                  | 4.346     | -61.9        | 32.6         | 70.5         |
| 8        | 3.791               | 3.542                  | 4.220                  | 2.340                  | 2.125                  | 4.354     | -61.1        | 32.4         | 69.9         |
| 9        | 3.710               | 2.816                  | 2.958                  | 2.268                  | 2.223                  | 3.618     | -84.6        | 45.4         | 97.4         |
| 10       | 3.811               | 3.562                  | 4.246                  | 2.356                  | 2.154                  | 4.378     | -61.8        | 31.3         | 70.1         |
| 11       | 3.847               | 3.641                  | 4.332                  | 2.350                  | 2.158                  | 4.442     | -59.7        | 31.1         | 68.1         |
| 12       | 3.825               | 3.601                  | 4.258                  | 2.339                  | 2.131                  | 4.407     | -60.5        | 28.1         | 69.0         |

### 5. Cartesian coordinates and energies for pyridinium complexes

*Compound 7:*

| Center Number | Z | Atomic Type | Coordinates (Angstroms) |           |           |
|---------------|---|-------------|-------------------------|-----------|-----------|
|               |   |             | X                       | Y         | Z         |
| 1             | 6 | 0           | 2.082396                | -0.521117 | -2.654221 |
| 2             | 6 | 0           | 1.558065                | 0.749154  | -1.956469 |
| 3             | 6 | 0           | 1.311892                | 0.569418  | -0.434963 |
| 4             | 6 | 0           | 2.418557                | -0.260122 | 0.254586  |
| 5             | 8 | 0           | 2.798650                | -1.412784 | -0.470875 |
| 6             | 6 | 0           | 3.168390                | -1.261727 | -1.846619 |
| 7             | 6 | 0           | 4.568267                | -0.665339 | -2.040563 |
| 8             | 8 | 0           | 2.479060                | 1.822820  | -2.069363 |
| 9             | 7 | 0           | -0.141363               | 0.197411  | -0.202291 |
| 10            | 6 | 0           | -1.026138               | 1.253721  | -0.327153 |
| 11            | 6 | 0           | -2.393758               | 1.034673  | -0.312417 |
| 12            | 6 | 0           | -2.936149               | -0.243494 | -0.148015 |
| 13            | 6 | 0           | -2.012614               | -1.269457 | 0.042485  |
| 14            | 6 | 0           | -0.634497               | -1.060104 | 0.042840  |
| 15            | 6 | 0           | 0.162003                | -2.283866 | 0.370629  |
| 16            | 6 | 0           | -0.583956               | 2.672162  | -0.489856 |
| 17            | 6 | 0           | -4.394013               | -0.483179 | -0.142767 |
| 18            | 6 | 0           | -4.954751               | -1.486449 | 0.665899  |
| 19            | 6 | 0           | -6.329792               | -1.707864 | 0.667612  |
| 20            | 6 | 0           | -7.165963               | -0.937403 | -0.142299 |
| 21            | 6 | 0           | -6.620492               | 0.061577  | -0.951082 |
| 22            | 6 | 0           | -5.246982               | 0.290667  | -0.948465 |
| 23            | 6 | 0           | 0.211881                | -3.337325 | -0.551971 |
| 24            | 6 | 0           | 0.793472                | -4.551592 | -0.194902 |
| 25            | 6 | 0           | 1.306763                | -4.729983 | 1.091230  |
| 26            | 6 | 0           | 1.221813                | -3.693808 | 2.020381  |
| 27            | 6 | 0           | 0.639762                | -2.473853 | 1.674362  |
| 28            | 6 | 0           | 0.046448                | 3.364467  | 0.556180  |
| 29            | 6 | 0           | 0.332494                | 4.720585  | 0.404358  |

|    |   |   |           |           |           |
|----|---|---|-----------|-----------|-----------|
| 30 | 6 | 0 | -0.004382 | 5.394332  | -0.770707 |
| 31 | 6 | 0 | -0.640104 | 4.709291  | -1.806762 |
| 32 | 6 | 0 | -0.937951 | 3.354728  | -1.663857 |
| 33 | 8 | 0 | 3.474696  | 0.646866  | 0.427185  |
| 34 | 6 | 0 | 4.316429  | 0.338307  | 1.543496  |
| 35 | 8 | 0 | 0.929614  | -1.324642 | -2.908967 |
| 36 | 6 | 0 | 1.082264  | -2.247610 | -3.971562 |
| 37 | 1 | 0 | 2.519080  | -0.211565 | -3.619562 |
| 38 | 1 | 0 | 0.605014  | 0.997380  | -2.441731 |
| 39 | 1 | 0 | 1.421086  | 1.545907  | 0.018751  |
| 40 | 1 | 0 | 2.081440  | -0.622608 | 1.223489  |
| 41 | 1 | 0 | 3.189973  | -2.296733 | -2.205554 |
| 42 | 1 | 0 | 4.592998  | 0.394223  | -1.788839 |
| 43 | 1 | 0 | 5.277499  | -1.194820 | -1.399370 |
| 44 | 1 | 0 | 4.886950  | -0.797716 | -3.081663 |
| 45 | 1 | 0 | 2.575531  | 2.034630  | -3.007217 |
| 46 | 1 | 0 | -3.034847 | 1.903852  | -0.379808 |
| 47 | 1 | 0 | -2.345364 | -2.285713 | 0.207435  |
| 48 | 1 | 0 | -4.317266 | -2.069061 | 1.323060  |
| 49 | 1 | 0 | -6.748828 | -2.477010 | 1.308870  |
| 50 | 1 | 0 | -7.265042 | 0.660484  | -1.587064 |
| 51 | 1 | 0 | -4.829441 | 1.055059  | -1.596490 |
| 52 | 1 | 0 | -0.190325 | -3.193207 | -1.547463 |
| 53 | 1 | 0 | 0.840711  | -5.359565 | -0.919433 |
| 54 | 1 | 0 | 1.603302  | -3.826756 | 3.028007  |
| 55 | 1 | 0 | 0.571792  | -1.676505 | 2.405349  |
| 56 | 1 | 0 | 0.324154  | 2.848475  | 1.470188  |
| 57 | 1 | 0 | 0.822092  | 5.247717  | 1.217068  |
| 58 | 1 | 0 | -0.909159 | 5.226709  | -2.722869 |
| 59 | 1 | 0 | -1.441374 | 2.821990  | -2.466240 |
| 60 | 1 | 0 | 5.053672  | 1.141496  | 1.597685  |
| 61 | 1 | 0 | 3.729307  | 0.308629  | 2.465198  |
| 62 | 1 | 0 | 4.835428  | -0.617314 | 1.394553  |
| 63 | 1 | 0 | 0.113923  | -2.732595 | -4.116488 |
| 64 | 1 | 0 | 1.365715  | -1.738626 | -4.905390 |
| 65 | 1 | 0 | 1.830753  | -3.022317 | -3.756668 |
| 66 | 9 | 0 | 1.722860  | -0.219979 | 3.501217  |
| 67 | 5 | 0 | 0.888877  | 0.922855  | 3.382374  |
| 68 | 9 | 0 | 0.372489  | 1.292375  | 4.604621  |
| 69 | 9 | 0 | 1.639452  | 1.964140  | 2.793376  |
| 70 | 9 | 0 | -0.162988 | 0.588729  | 2.471470  |
| 71 | 1 | 0 | 1.759897  | -5.676965 | 1.369537  |
| 72 | 1 | 0 | 0.225342  | 6.450201  | -0.878347 |
| 73 | 1 | 0 | -8.237443 | -1.112015 | -0.141278 |

-----  
E(B3LYP) = -1980.64080303 a.u.

Imaginary frequencies: 0

Compound 8:

| Center<br>Number | Z | Atomic<br>Type | Coordinates (Angstroms) |           |           |
|------------------|---|----------------|-------------------------|-----------|-----------|
|                  |   |                | X                       | Y         | Z         |
| 1                | 6 | 0              | 2.065909                | 0.282165  | -2.702111 |
| 2                | 6 | 0              | 1.196562                | 1.276661  | -1.908359 |
| 3                | 6 | 0              | 1.038522                | 0.916004  | -0.407414 |
| 4                | 6 | 0              | 2.343163                | 0.382817  | 0.226310  |
| 5                | 8 | 0              | 3.033952                | -0.542518 | -0.589755 |
| 6                | 6 | 0              | 3.330176                | -0.170743 | -1.941764 |
| 7                | 6 | 0              | 4.488684                | 0.827484  | -2.060228 |
| 8                | 8 | 0              | 1.751579                | 2.582577  | -1.924149 |
| 9                | 7 | 0              | -0.248470               | 0.137768  | -0.206474 |
| 10               | 6 | 0              | -1.394070               | 0.914181  | -0.224752 |
| 11               | 6 | 0              | -2.646915               | 0.322789  | -0.232081 |
| 12               | 6 | 0              | -2.810055               | -1.065381 | -0.194473 |
| 13               | 6 | 0              | -1.633471               | -1.807837 | -0.107461 |
| 14               | 6 | 0              | -0.367906               | -1.225161 | -0.086814 |
| 15               | 6 | 0              | 0.749386                | -2.198225 | 0.114820  |
| 16               | 6 | 0              | -1.363067               | 2.406933  | -0.245123 |
| 17               | 6 | 0              | -4.144021               | -1.699675 | -0.205703 |
| 18               | 6 | 0              | -4.380138               | -2.888972 | 0.505252  |
| 19               | 6 | 0              | -5.640486               | -3.481201 | 0.494201  |
| 20               | 6 | 0              | -6.682441               | -2.901622 | -0.232140 |
| 21               | 6 | 0              | -6.459558               | -1.721397 | -0.943949 |
| 22               | 6 | 0              | -5.202772               | -1.122006 | -0.927381 |
| 23               | 6 | 0              | 1.069698                | -3.099377 | -0.909155 |
| 24               | 6 | 0              | 1.981813                | -4.127021 | -0.686330 |
| 25               | 6 | 0              | 2.546201                | -4.252733 | 0.578481  |
| 26               | 6 | 0              | 2.213537                | -3.399694 | 1.622406  |
| 27               | 6 | 0              | 1.299074                | -2.373409 | 1.393430  |
| 28               | 6 | 0              | -0.909045               | 3.145564  | 0.861488  |
| 29               | 6 | 0              | -1.003459               | 4.534437  | 0.853704  |
| 30               | 6 | 0              | -1.553175               | 5.171962  | -0.252874 |
| 31               | 6 | 0              | -2.021058               | 4.466471  | -1.355471 |
| 32               | 6 | 0              | -1.930775               | 3.076305  | -1.339985 |
| 33               | 9 | 0              | 3.429264                | -5.247706 | 0.797699  |
| 34               | 9 | 0              | -1.640739               | 6.515439  | -0.259571 |
| 35               | 8 | 0              | 3.094125                | 1.536172  | 0.497914  |
| 36               | 6 | 0              | 4.007787                | 1.378053  | 1.589079  |
| 37               | 8 | 0              | 1.200160                | -0.799639 | -3.046368 |
| 38               | 6 | 0              | 1.614055                | -1.542983 | -4.178730 |
| 39               | 1 | 0              | 2.383747                | 0.788542  | -3.630153 |
| 40               | 1 | 0              | 0.205035                | 1.265492  | -2.381447 |
| 41               | 1 | 0              | 0.878389                | 1.847951  | 0.117696  |
| 42               | 1 | 0              | 2.133453                | -0.145460 | 1.154262  |
| 43               | 1 | 0              | 3.654384                | -1.118039 | -2.386237 |
| 44               | 1 | 0              | 4.202061                | 1.821036  | -1.717425 |
| 45               | 1 | 0              | 5.328506                | 0.477608  | -1.454743 |

|    |   |   |           |           |           |
|----|---|---|-----------|-----------|-----------|
| 46 | 1 | 0 | 4.823194  | 0.886079  | -3.103018 |
| 47 | 1 | 0 | 1.822382  | 2.867037  | -2.845054 |
| 48 | 1 | 0 | -3.505422 | 0.981199  | -0.209343 |
| 49 | 1 | 0 | -1.669239 | -2.887200 | -0.041034 |
| 50 | 1 | 0 | -3.586024 | -3.329940 | 1.099142  |
| 51 | 1 | 0 | -5.811034 | -4.391292 | 1.060754  |
| 52 | 1 | 0 | -7.264205 | -1.268818 | -1.515164 |
| 53 | 1 | 0 | -5.033757 | -0.215760 | -1.500778 |
| 54 | 1 | 0 | 0.615692  | -2.982424 | -1.885189 |
| 55 | 1 | 0 | 2.253828  | -4.827614 | -1.468115 |
| 56 | 1 | 0 | 2.659008  | -3.540110 | 2.600798  |
| 57 | 1 | 0 | 1.029890  | -1.705864 | 2.204041  |
| 58 | 1 | 0 | -0.468803 | 2.643882  | 1.718644  |
| 59 | 1 | 0 | -0.655884 | 5.119751  | 1.697480  |
| 60 | 1 | 0 | -2.446905 | 5.001380  | -2.196937 |
| 61 | 1 | 0 | -2.298595 | 2.508086  | -2.189627 |
| 62 | 1 | 0 | 4.475323  | 2.353306  | 1.736141  |
| 63 | 1 | 0 | 3.470702  | 1.082820  | 2.494241  |
| 64 | 1 | 0 | 4.783117  | 0.638703  | 1.351186  |
| 65 | 1 | 0 | 0.825671  | -2.269040 | -4.391288 |
| 66 | 1 | 0 | 1.741830  | -0.893370 | -5.057783 |
| 67 | 1 | 0 | 2.552586  | -2.087612 | -4.008740 |
| 68 | 9 | 0 | 1.715262  | -0.132625 | 3.457054  |
| 69 | 5 | 0 | 0.595878  | 0.740689  | 3.439584  |
| 70 | 9 | 0 | 0.030663  | 0.855344  | 4.688958  |
| 71 | 9 | 0 | 1.019257  | 1.993919  | 2.938606  |
| 72 | 9 | 0 | -0.345542 | 0.206552  | 2.505431  |
| 73 | 1 | 0 | -7.663965 | -3.365532 | -0.240878 |

-----  
E(B3LYP) = -2179.10495306 a.u.

Imaginary frequencies: 0

*Compound 9:*

| Center<br>Number | Z | Atomic<br>Type | Coordinates (Angstroms) |           |           |
|------------------|---|----------------|-------------------------|-----------|-----------|
|                  |   |                | X                       | Y         | Z         |
| 1                | 6 | 0              | 4.462653                | -0.150798 | -1.669179 |
| 2                | 6 | 0              | 3.486430                | 0.947436  | -1.195113 |
| 3                | 6 | 0              | 2.567154                | 0.575129  | -0.001956 |
| 4                | 6 | 0              | 3.168809                | -0.448925 | 0.987763  |
| 5                | 8 | 0              | 3.957505                | -1.444122 | 0.368691  |
| 6                | 6 | 0              | 5.001281                | -1.033099 | -0.523165 |
| 7                | 6 | 0              | 6.206325                | -0.399753 | 0.184194  |
| 8                | 8 | 0              | 4.208279                | 2.085123  | -0.732256 |
| 9                | 7 | 0              | 1.123727                | 0.339895  | -0.400215 |
| 10               | 6 | 0              | 0.363346                | 1.486347  | -0.533780 |
| 11               | 6 | 0              | -1.007877               | 1.417911  | -0.698407 |



|    |   |   |            |           |           |
|----|---|---|------------|-----------|-----------|
| 12 | 6 | 0 | -1.686058  | 0.198904  | -0.625961 |
| 13 | 6 | 0 | -0.887230  | -0.939506 | -0.537428 |
| 14 | 6 | 0 | 0.497418   | -0.884694 | -0.448305 |
| 15 | 6 | 0 | 1.179091   | -2.215973 | -0.428049 |
| 16 | 6 | 0 | 0.962284   | 2.852348  | -0.424197 |
| 17 | 6 | 0 | -3.156350  | 0.111891  | -0.594622 |
| 18 | 6 | 0 | -3.773912  | -0.708624 | 0.364878  |
| 19 | 6 | 0 | -5.160606  | -0.793020 | 0.419900  |
| 20 | 6 | 0 | -5.973502  | -0.075965 | -0.475585 |
| 21 | 6 | 0 | -5.343443  | 0.749149  | -1.424001 |
| 22 | 6 | 0 | -3.957969  | 0.850874  | -1.477787 |
| 23 | 6 | 0 | 1.712600   | -2.744870 | -1.608412 |
| 24 | 6 | 0 | 2.192028   | -4.052779 | -1.640782 |
| 25 | 6 | 0 | 2.118044   | -4.818597 | -0.484000 |
| 26 | 6 | 0 | 1.563567   | -4.328875 | 0.692448  |
| 27 | 6 | 0 | 1.074363   | -3.025330 | 0.715414  |
| 28 | 6 | 0 | 1.075971   | 3.456017  | 0.839244  |
| 29 | 6 | 0 | 1.541045   | 4.764130  | 0.946941  |
| 30 | 6 | 0 | 1.873624   | 5.457509  | -0.211702 |
| 31 | 6 | 0 | 1.750221   | 4.891391  | -1.474896 |
| 32 | 6 | 0 | 1.285781   | 3.580638  | -1.575218 |
| 33 | 9 | 0 | 2.585087   | -6.083704 | -0.511648 |
| 34 | 9 | 0 | 2.321444   | 6.723932  | -0.110072 |
| 35 | 8 | 0 | 3.891985   | 0.330516  | 1.908851  |
| 36 | 6 | 0 | 4.131073   | -0.344158 | 3.148938  |
| 37 | 8 | 0 | 3.780494   | -0.880100 | -2.683931 |
| 38 | 6 | 0 | 4.623239   | -1.604622 | -3.561513 |
| 39 | 6 | 0 | -7.452849  | -0.178462 | -0.416776 |
| 40 | 6 | 0 | -8.120145  | -0.273216 | 0.816370  |
| 41 | 6 | 0 | -9.509308  | -0.369159 | 0.871271  |
| 42 | 6 | 0 | -10.261199 | -0.373793 | -0.304770 |
| 43 | 6 | 0 | -9.612002  | -0.281043 | -1.536922 |
| 44 | 6 | 0 | -8.222925  | -0.183526 | -1.592241 |
| 45 | 1 | 0 | 5.323158   | 0.363526  | -2.131937 |
| 46 | 1 | 0 | 2.861401   | 1.198154  | -2.062705 |
| 47 | 1 | 0 | 2.513140   | 1.479023  | 0.592614  |
| 48 | 1 | 0 | 2.381868   | -0.987589 | 1.514393  |
| 49 | 1 | 0 | 5.326950   | -1.981596 | -0.962483 |
| 50 | 1 | 0 | 5.978449   | 0.598067  | 0.558542  |
| 51 | 1 | 0 | 6.508541   | -1.028413 | 1.025388  |
| 52 | 1 | 0 | 7.050919   | -0.337160 | -0.512267 |
| 53 | 1 | 0 | 4.771743   | 2.398341  | -1.452173 |
| 54 | 1 | 0 | -1.553029  | 2.351369  | -0.762516 |
| 55 | 1 | 0 | -1.340911  | -1.921140 | -0.527655 |
| 56 | 1 | 0 | -3.157315  | -1.223167 | 1.095670  |
| 57 | 1 | 0 | -5.622093  | -1.436436 | 1.162238  |
| 58 | 1 | 0 | -5.948616  | 1.334834  | -2.108702 |
| 59 | 1 | 0 | -3.494566  | 1.492585  | -2.222120 |
| 60 | 1 | 0 | 1.762370   | -2.134069 | -2.500077 |
| 61 | 1 | 0 | 2.606930   | -4.484618 | -2.544887 |

|    |   |   |            |           |           |
|----|---|---|------------|-----------|-----------|
| 62 | 1 | 0 | 1.511963   | -4.964216 | 1.569522  |
| 63 | 1 | 0 | 0.636794   | -2.622542 | 1.622921  |
| 64 | 1 | 0 | 0.804854   | 2.884672  | 1.721900  |
| 65 | 1 | 0 | 1.642217   | 5.249027  | 1.911399  |
| 66 | 1 | 0 | 2.005868   | 5.474742  | -2.352449 |
| 67 | 1 | 0 | 1.168683   | 3.128112  | -2.555610 |
| 68 | 1 | 0 | 4.645187   | 0.372421  | 3.792199  |
| 69 | 1 | 0 | 3.182760   | -0.645126 | 3.605142  |
| 70 | 1 | 0 | 4.770681   | -1.223514 | 3.005210  |
| 71 | 1 | 0 | 3.984229   | -2.026256 | -4.340756 |
| 72 | 1 | 0 | 5.369192   | -0.946227 | -4.032555 |
| 73 | 1 | 0 | 5.151189   | -2.427387 | -3.061657 |
| 74 | 1 | 0 | -7.547286  | -0.243470 | 1.738154  |
| 75 | 1 | 0 | -10.005426 | -0.432238 | 1.835328  |
| 76 | 1 | 0 | -11.343608 | -0.449220 | -0.261355 |
| 77 | 1 | 0 | -10.187283 | -0.293029 | -2.458141 |
| 78 | 1 | 0 | -7.726191  | -0.139218 | -2.556883 |
| 79 | 5 | 0 | -0.140504  | -0.281304 | 3.032430  |
| 80 | 9 | 0 | -0.676080  | 0.180028  | 4.210262  |
| 81 | 9 | 0 | 0.952418   | -1.159118 | 3.266232  |
| 82 | 9 | 0 | -1.103659  | -0.991296 | 2.269965  |
| 83 | 9 | 0 | 0.346540   | 0.802641  | 2.238513  |

-----:  
E(B3LYP) = -2410.17145082 a.u.

Imaginary frequencies: 0

*Compound 10:*

| Center<br>Number | Z | Atomic<br>Type | Coordinates (Angstroms) |           |           |
|------------------|---|----------------|-------------------------|-----------|-----------|
|                  |   |                | X                       | Y         | Z         |
| 1                | 6 | 0              | 3.234822                | -0.688463 | -2.674719 |
| 2                | 6 | 0              | 2.838132                | 0.621788  | -1.967919 |
| 3                | 6 | 0              | 2.577935                | 0.459172  | -0.446818 |
| 4                | 6 | 0              | 3.589763                | -0.485214 | 0.239020  |
| 5                | 8 | 0              | 3.858553                | -1.661613 | -0.497800 |
| 6                | 6 | 0              | 4.243477                | -1.535577 | -1.871490 |
| 7                | 6 | 0              | 5.693848                | -1.071647 | -2.055951 |
| 8                | 8 | 0              | 3.861373                | 1.599634  | -2.073997 |
| 9                | 7 | 0              | 1.095644                | 0.245701  | -0.207022 |
| 10               | 6 | 0              | 0.331367                | 1.394916  | -0.307767 |
| 11               | 6 | 0              | -1.051461               | 1.327616  | -0.287552 |
| 12               | 6 | 0              | -1.731327               | 0.114176  | -0.138838 |
| 13               | 6 | 0              | -0.924013               | -1.010427 | 0.028488  |
| 14               | 6 | 0              | 0.468250                | -0.954139 | 0.021693  |
| 15               | 6 | 0              | 1.127559                | -2.262623 | 0.329577  |
| 16               | 6 | 0              | 0.927460                | 2.758471  | -0.445444 |
| 17               | 6 | 0              | -3.204190               | 0.039128  | -0.120452 |
| 18               | 6 | 0              | -3.872354               | -0.919664 | 0.660161  |

|    |   |   |            |           |           |
|----|---|---|------------|-----------|-----------|
| 19 | 6 | 0 | -5.260330  | -0.981438 | 0.678806  |
| 20 | 6 | 0 | -6.040373  | -0.095603 | -0.084756 |
| 21 | 6 | 0 | -5.368116  | 0.859702  | -0.867059 |
| 22 | 6 | 0 | -3.980546  | 0.929747  | -0.881639 |
| 23 | 6 | 0 | 1.061462   | -3.302298 | -0.607451 |
| 24 | 6 | 0 | 1.502686   | -4.578836 | -0.266836 |
| 25 | 6 | 0 | 1.990350   | -4.831203 | 1.016966  |
| 26 | 6 | 0 | 2.022058   | -3.804157 | 1.959645  |
| 27 | 6 | 0 | 1.581359   | -2.522058 | 1.630112  |
| 28 | 6 | 0 | 1.635076   | 3.354523  | 0.610701  |
| 29 | 6 | 0 | 2.072632   | 4.672102  | 0.482781  |
| 30 | 6 | 0 | 1.811672   | 5.402127  | -0.677969 |
| 31 | 6 | 0 | 1.100179   | 4.813268  | -1.723878 |
| 32 | 6 | 0 | 0.651024   | 3.498684  | -1.605131 |
| 33 | 8 | 0 | 4.730727   | 0.308851  | 0.433277  |
| 34 | 6 | 0 | 5.535584   | -0.113251 | 1.539410  |
| 35 | 8 | 0 | 2.009740   | -1.373754 | -2.935175 |
| 36 | 6 | 0 | 2.073635   | -2.302029 | -4.002374 |
| 37 | 6 | 0 | -7.521895  | -0.163692 | -0.063013 |
| 38 | 6 | 0 | -8.212065  | -0.464620 | 1.123679  |
| 39 | 6 | 0 | -9.603952  | -0.526763 | 1.144056  |
| 40 | 6 | 0 | -10.335375 | -0.291065 | -0.021220 |
| 41 | 6 | 0 | -9.663307  | 0.008529  | -1.207367 |
| 42 | 6 | 0 | -8.271507  | 0.072570  | -1.227998 |
| 43 | 1 | 0 | 3.700495   | -0.417824 | -3.638333 |
| 44 | 1 | 0 | 1.913716   | 0.967574  | -2.449620 |
| 45 | 1 | 0 | 2.793255   | 1.417599  | 0.007137  |
| 46 | 1 | 0 | 3.209890   | -0.824276 | 1.200804  |
| 47 | 1 | 0 | 4.167792   | -2.565081 | -2.238668 |
| 48 | 1 | 0 | 5.817396   | -0.023726 | -1.785037 |
| 49 | 1 | 0 | 6.348613   | -1.676413 | -1.423440 |
| 50 | 1 | 0 | 6.001041   | -1.215689 | -3.098947 |
| 51 | 1 | 0 | 3.995576   | 1.790140  | -3.011852 |
| 52 | 1 | 0 | -1.592446  | 2.263592  | -0.334415 |
| 53 | 1 | 0 | -1.365577  | -1.986075 | 0.182597  |
| 54 | 1 | 0 | -3.303110  | -1.604055 | 1.280834  |
| 55 | 1 | 0 | -5.748878  | -1.739423 | 1.282494  |
| 56 | 1 | 0 | -5.942220  | 1.570768  | -1.452502 |
| 57 | 1 | 0 | -3.493887  | 1.673006  | -1.505721 |
| 58 | 1 | 0 | 0.678639   | -3.100215 | -1.600424 |
| 59 | 1 | 0 | 1.460072   | -5.377379 | -1.002060 |
| 60 | 1 | 0 | 2.385376   | -3.992404 | 2.965179  |
| 61 | 1 | 0 | 1.603526   | -1.731272 | 2.370995  |
| 62 | 1 | 0 | 1.855714   | 2.793692  | 1.514061  |
| 63 | 1 | 0 | 2.620903   | 5.124649  | 1.302965  |
| 64 | 1 | 0 | 0.889971   | 5.375243  | -2.629087 |
| 65 | 1 | 0 | 0.088952   | 3.041640  | -2.415189 |
| 66 | 1 | 0 | 6.347463   | 0.612219  | 1.617657  |
| 67 | 1 | 0 | 4.946047   | -0.112825 | 2.460162  |
| 68 | 1 | 0 | 5.958827   | -1.110167 | 1.361573  |

|    |   |   |            |           |           |
|----|---|---|------------|-----------|-----------|
| 69 | 1 | 0 | 1.064033   | -2.693724 | -4.147576 |
| 70 | 1 | 0 | 2.401978   | -1.817128 | -4.934362 |
| 71 | 1 | 0 | 2.747078   | -3.144107 | -3.792625 |
| 72 | 1 | 0 | -7.655062  | -0.621603 | 2.042347  |
| 73 | 1 | 0 | -10.117976 | -0.750900 | 2.074046  |
| 74 | 1 | 0 | -11.419965 | -0.339936 | -0.004948 |
| 75 | 1 | 0 | -10.223178 | 0.185135  | -2.121064 |
| 76 | 1 | 0 | -7.757904  | 0.279937  | -2.161970 |
| 77 | 5 | 0 | 2.183187   | 0.792745  | 3.404122  |
| 78 | 9 | 0 | 1.687686   | 1.180829  | 4.629549  |
| 79 | 9 | 0 | 2.895398   | -0.431446 | 3.502258  |
| 80 | 9 | 0 | 1.116383   | 0.588542  | 2.472079  |
| 81 | 9 | 0 | 3.043344   | 1.767605  | 2.853749  |
| 82 | 1 | 0 | 2.333488   | -5.826977 | 1.282563  |
| 83 | 1 | 0 | 2.159390   | 6.427156  | -0.766920 |

-----  
E(B3LYP) = -2211.70505404 a.u.

Imaginary frequencies: 0

*Compound 11:*

| Center<br>Number | Z | Atomic<br>Type | Coordinates (Angstroms) |           |           |
|------------------|---|----------------|-------------------------|-----------|-----------|
|                  |   |                | X                       | Y         | Z         |
| 1                | 6 | 0              | -3.038706               | 0.506789  | -2.795369 |
| 2                | 6 | 0              | -2.658474               | -0.747696 | -1.986782 |
| 3                | 6 | 0              | -2.444884               | -0.479131 | -0.473373 |
| 4                | 6 | 0              | -3.478078               | 0.505887  | 0.115894  |
| 5                | 8 | 0              | -3.732889               | 1.625786  | -0.709363 |
| 6                | 6 | 0              | -4.074072               | 1.402438  | -2.082160 |
| 7                | 6 | 0              | -5.516647               | 0.918921  | -2.278838 |
| 8                | 8 | 0              | -3.675421               | -1.736224 | -2.055471 |
| 9                | 7 | 0              | -0.970280               | -0.251460 | -0.204732 |
| 10               | 6 | 0              | -0.208865               | -1.407850 | -0.188892 |
| 11               | 6 | 0              | 1.174612                | -1.339009 | -0.165269 |
| 12               | 6 | 0              | 1.854988                | -0.117271 | -0.129030 |
| 13               | 6 | 0              | 1.049150                | 1.019202  | -0.067399 |
| 14               | 6 | 0              | -0.343252               | 0.964098  | -0.075707 |
| 15               | 6 | 0              | -1.009189               | 2.287266  | 0.122926  |
| 16               | 6 | 0              | -0.808238               | -2.774346 | -0.196209 |
| 17               | 6 | 0              | 3.328189                | -0.041544 | -0.110070 |
| 18               | 6 | 0              | 3.993252                | 0.985303  | 0.581671  |
| 19               | 6 | 0              | 5.381163                | 1.048841  | 0.600963  |
| 20               | 6 | 0              | 6.164408                | 0.096249  | -0.073647 |
| 21               | 6 | 0              | 5.495508                | -0.927856 | -0.766482 |
| 22               | 6 | 0              | 4.107888                | -0.998893 | -0.781253 |
| 23               | 6 | 0              | -0.912628               | 3.268294  | -0.871430 |
| 24               | 6 | 0              | -1.366429               | 4.561544  | -0.627459 |
| 25               | 6 | 0              | -1.905437               | 4.916259  | 0.616150  |

|    |   |   |           |           |           |
|----|---|---|-----------|-----------|-----------|
| 26 | 6 | 0 | -1.954493 | 3.935665  | 1.614313  |
| 27 | 6 | 0 | -1.505539 | 2.636937  | 1.386372  |
| 28 | 6 | 0 | -1.558818 | -3.251792 | 0.891809  |
| 29 | 6 | 0 | -1.996140 | -4.572092 | 0.896140  |
| 30 | 6 | 0 | -1.708097 | -5.449829 | -0.159347 |
| 31 | 6 | 0 | -0.949330 | -4.964668 | -1.230264 |
| 32 | 6 | 0 | -0.495711 | -3.646475 | -1.247786 |
| 33 | 8 | 0 | -4.620810 | -0.280139 | 0.334439  |
| 34 | 6 | 0 | -5.463742 | 0.219096  | 1.378375  |
| 35 | 8 | 0 | -1.809120 | 1.177072  | -3.071141 |
| 36 | 6 | 0 | -1.850473 | 2.041266  | -4.191620 |
| 37 | 6 | 0 | 7.645876  | 0.166881  | -0.051426 |
| 38 | 6 | 0 | 8.330178  | 0.573886  | 1.106721  |
| 39 | 6 | 0 | 9.721916  | 0.638913  | 1.128250  |
| 40 | 6 | 0 | 10.459219 | 0.300127  | -0.007541 |
| 41 | 6 | 0 | 9.793062  | -0.105193 | -1.165265 |
| 42 | 6 | 0 | 8.401381  | -0.172002 | -1.186902 |
| 43 | 6 | 0 | -2.428620 | 6.309213  | 0.869820  |
| 44 | 6 | 0 | -2.215992 | -6.870916 | -0.139614 |
| 45 | 1 | 0 | -3.476994 | 0.166514  | -3.749937 |
| 46 | 1 | 0 | -1.718637 | -1.122230 | -2.414428 |
| 47 | 1 | 0 | -2.675466 | -1.406154 | 0.033976  |
| 48 | 1 | 0 | -3.127150 | 0.914662  | 1.061393  |
| 49 | 1 | 0 | -3.991803 | 2.404560  | -2.517366 |
| 50 | 1 | 0 | -5.645868 | -0.109071 | -1.942039 |
| 51 | 1 | 0 | -6.192792 | 1.561566  | -1.709274 |
| 52 | 1 | 0 | -5.792198 | 0.990304  | -3.338078 |
| 53 | 1 | 0 | -3.778436 | -1.992712 | -2.981459 |
| 54 | 1 | 0 | 1.714557  | -2.275437 | -0.116311 |
| 55 | 1 | 0 | 1.491249  | 2.004148  | 0.003721  |
| 56 | 1 | 0 | 3.421318  | 1.724221  | 1.133534  |
| 57 | 1 | 0 | 5.867541  | 1.859310  | 1.134135  |
| 58 | 1 | 0 | 6.072028  | -1.690591 | -1.280066 |
| 59 | 1 | 0 | 3.623860  | -1.796863 | -1.335817 |
| 60 | 1 | 0 | -0.493100 | 3.010469  | -1.836524 |
| 61 | 1 | 0 | -1.295189 | 5.309477  | -1.413454 |
| 62 | 1 | 0 | -2.345444 | 4.185358  | 2.597050  |
| 63 | 1 | 0 | -1.549379 | 1.902419  | 2.181968  |
| 64 | 1 | 0 | -1.806333 | -2.597922 | 1.722437  |
| 65 | 1 | 0 | -2.574392 | -4.924174 | 1.746061  |
| 66 | 1 | 0 | -0.705941 | -5.624447 | -2.058983 |
| 67 | 1 | 0 | 0.098948  | -3.291611 | -2.085442 |
| 68 | 1 | 0 | -6.269607 | -0.508622 | 1.490780  |
| 69 | 1 | 0 | -4.902974 | 0.300655  | 2.313231  |
| 70 | 1 | 0 | -5.892511 | 1.192650  | 1.108032  |
| 71 | 1 | 0 | -0.834051 | 2.409647  | -4.349807 |
| 72 | 1 | 0 | -2.177483 | 1.506739  | -5.096622 |
| 73 | 1 | 0 | -2.513176 | 2.903408  | -4.037805 |
| 74 | 1 | 0 | 7.768420  | 0.812423  | 2.004726  |
| 75 | 1 | 0 | 10.231244 | 0.946268  | 2.036810  |

|    |   |   |           |           |           |
|----|---|---|-----------|-----------|-----------|
| 76 | 1 | 0 | 11.543704 | 0.351204  | 0.009534  |
| 77 | 1 | 0 | 10.357481 | -0.362438 | -2.056767 |
| 78 | 1 | 0 | 7.892773  | -0.462321 | -2.101293 |
| 79 | 1 | 0 | -1.971647 | 7.039934  | 0.195905  |
| 80 | 1 | 0 | -3.513791 | 6.354494  | 0.715289  |
| 81 | 1 | 0 | -2.236695 | 6.627351  | 1.898978  |
| 82 | 1 | 0 | -2.016311 | -7.350908 | 0.823955  |
| 83 | 1 | 0 | -3.301120 | -6.902068 | -0.294191 |
| 84 | 1 | 0 | -1.751347 | -7.475645 | -0.923206 |
| 85 | 5 | 0 | -2.196884 | -0.492727 | 3.433786  |
| 86 | 9 | 0 | -1.711695 | -0.748034 | 4.698143  |
| 87 | 9 | 0 | -2.902532 | 0.738789  | 3.394414  |
| 88 | 9 | 0 | -1.119898 | -0.392385 | 2.494251  |
| 89 | 9 | 0 | -3.055275 | -1.517451 | 2.984548  |

-----  
E(B3LYP) = -2290.34747440 a.u.

Imaginary frequencies: 0

*Compound 12:*

| Center<br>Number | Z | Atomic<br>Type | Coordinates (Angstroms) |           |           |
|------------------|---|----------------|-------------------------|-----------|-----------|
|                  |   |                | X                       | Y         | Z         |
| 1                | 6 | 0              | 2.366136                | -0.387185 | -2.788342 |
| 2                | 6 | 0              | 1.839641                | 0.834857  | -2.009866 |
| 3                | 6 | 0              | 1.670182                | 0.592121  | -0.485804 |
| 4                | 6 | 0              | 2.801893                | -0.267466 | 0.122186  |
| 5                | 8 | 0              | 3.165077                | -1.376282 | -0.677531 |
| 6                | 6 | 0              | 3.490585                | -1.146019 | -2.053659 |
| 7                | 6 | 0              | 4.871439                | -0.510596 | -2.259336 |
| 8                | 8 | 0              | 2.726164                | 1.938675  | -2.114855 |
| 9                | 7 | 0              | 0.228993                | 0.229760  | -0.187743 |
| 10               | 6 | 0              | -0.644126               | 1.304348  | -0.184336 |
| 11               | 6 | 0              | -2.012385               | 1.101145  | -0.134780 |
| 12               | 6 | 0              | -2.573241               | -0.180280 | -0.061719 |
| 13               | 6 | 0              | -1.654396               | -1.229033 | 0.014081  |
| 14               | 6 | 0              | -0.276120               | -1.037169 | -0.020657 |
| 15               | 6 | 0              | 0.523601                | -2.283613 | 0.182630  |
| 16               | 6 | 0              | -0.180657               | 2.722695  | -0.232408 |
| 17               | 6 | 0              | -4.027287               | -0.401088 | -0.025213 |
| 18               | 6 | 0              | -4.582606               | -1.511698 | 0.644148  |
| 19               | 6 | 0              | -5.950431               | -1.717861 | 0.676911  |
| 20               | 6 | 0              | -6.817437               | -0.820717 | 0.030027  |
| 21               | 6 | 0              | -6.286423               | 0.288364  | -0.643532 |
| 22               | 6 | 0              | -4.908701               | 0.488393  | -0.659159 |
| 23               | 6 | 0              | 0.520504                | -3.274228 | -0.808310 |
| 24               | 6 | 0              | 1.114661                | -4.510998 | -0.573464 |
| 25               | 6 | 0              | 1.687004                | -4.748059 | 0.671651  |
| 26               | 6 | 0              | 1.665857                | -3.799476 | 1.685512  |

|    |   |   |            |           |           |
|----|---|---|------------|-----------|-----------|
| 27 | 6 | 0 | 1.068457   | -2.563935 | 1.444493  |
| 28 | 6 | 0 | 0.525935   | 3.296862  | 0.838838  |
| 29 | 6 | 0 | 0.841466   | 4.652446  | 0.814199  |
| 30 | 6 | 0 | 0.445784   | 5.422508  | -0.273775 |
| 31 | 6 | 0 | -0.262262  | 4.883830  | -1.341807 |
| 32 | 6 | 0 | -0.580839  | 3.527830  | -1.309614 |
| 33 | 9 | 0 | 2.263182   | -5.945227 | 0.902433  |
| 34 | 9 | 0 | 0.753479   | 6.733389  | -0.296717 |
| 35 | 8 | 0 | 3.858715   | 0.635245  | 0.314810  |
| 36 | 6 | 0 | 4.755807   | 0.247161  | 1.361395  |
| 37 | 8 | 0 | 1.224147   | -1.200736 | -3.055284 |
| 38 | 6 | 0 | 1.367203   | -2.061828 | -4.170225 |
| 39 | 8 | 0 | -8.138355  | -1.113378 | 0.115589  |
| 40 | 6 | 0 | -9.074125  | -0.232456 | -0.496127 |
| 41 | 1 | 0 | 2.768144   | -0.017965 | -3.748004 |
| 42 | 1 | 0 | 0.857756   | 1.075826  | -2.440389 |
| 43 | 1 | 0 | 1.815374   | 1.552753  | -0.010605 |
| 44 | 1 | 0 | 2.498101   | -0.685512 | 1.079879  |
| 45 | 1 | 0 | 3.520708   | -2.160123 | -2.466870 |
| 46 | 1 | 0 | 4.883848   | 0.534256  | -1.951409 |
| 47 | 1 | 0 | 5.612529   | -1.057878 | -1.671494 |
| 48 | 1 | 0 | 5.157673   | -0.580419 | -3.315782 |
| 49 | 1 | 0 | 2.828618   | 2.153281  | -3.051571 |
| 50 | 1 | 0 | -2.639509  | 1.981825  | -0.093154 |
| 51 | 1 | 0 | -1.993904  | -2.251412 | 0.113557  |
| 52 | 1 | 0 | -3.936477  | -2.200547 | 1.178385  |
| 53 | 1 | 0 | -6.379617  | -2.561029 | 1.206992  |
| 54 | 1 | 0 | -6.931016  | 0.990718  | -1.157406 |
| 55 | 1 | 0 | -4.515363  | 1.340572  | -1.204659 |
| 56 | 1 | 0 | 0.067198   | -3.066338 | -1.769469 |
| 57 | 1 | 0 | 1.135396   | -5.286868 | -1.330854 |
| 58 | 1 | 0 | 2.105141   | -4.026007 | 2.650463  |
| 59 | 1 | 0 | 1.041949   | -1.820083 | 2.232339  |
| 60 | 1 | 0 | 0.842700   | 2.689868  | 1.681978  |
| 61 | 1 | 0 | 1.387908   | 5.109997  | 1.631140  |
| 62 | 1 | 0 | -0.553973  | 5.519111  | -2.170607 |
| 63 | 1 | 0 | -1.138591  | 3.090952  | -2.133084 |
| 64 | 1 | 0 | 5.484877   | 1.054596  | 1.450017  |
| 65 | 1 | 0 | 4.212750   | 0.131124  | 2.303071  |
| 66 | 1 | 0 | 5.278055   | -0.684269 | 1.108401  |
| 67 | 1 | 0 | 0.405913   | -2.560454 | -4.315675 |
| 68 | 1 | 0 | 1.613383   | -1.497094 | -5.082260 |
| 69 | 1 | 0 | 2.137897   | -2.829532 | -4.017839 |
| 70 | 1 | 0 | -10.058054 | -0.655452 | -0.292788 |
| 71 | 1 | 0 | -9.016155  | 0.774705  | -0.066563 |
| 72 | 1 | 0 | -8.921435  | -0.174982 | -1.580594 |
| 73 | 9 | 0 | 2.248464   | -0.506419 | 3.398387  |
| 74 | 5 | 0 | 1.427954   | 0.652517  | 3.419920  |
| 75 | 9 | 0 | 0.957541   | 0.907557  | 4.688416  |
| 76 | 9 | 0 | 2.173985   | 1.737075  | 2.908696  |

77 9 0 0.342100 0.418532 2.517005

-----  
E(B3LYP) = -2293.63216049 a.u.

Imaginary frequencies: 0

*Compound 12a:*

| Center<br>Number | Z | Atomic<br>Type | Coordinates (Angstroms) |           |           |
|------------------|---|----------------|-------------------------|-----------|-----------|
|                  |   |                | X                       | Y         | Z         |
| 1                | 6 | 0              | 2.740788                | -0.180586 | -2.408610 |
| 2                | 6 | 0              | 2.307796                | 1.016299  | -1.542223 |
| 3                | 6 | 0              | 1.855323                | 0.594687  | -0.119511 |
| 4                | 6 | 0              | 2.917707                | -0.342005 | 0.495685  |
| 5                | 8 | 0              | 3.312668                | -1.402620 | -0.321431 |
| 6                | 6 | 0              | 3.700337                | -1.149651 | -1.686061 |
| 7                | 6 | 0              | 5.176969                | -0.754916 | -1.803211 |
| 8                | 8 | 0              | 3.355169                | 1.965400  | -1.444197 |
| 9                | 7 | 0              | 0.393218                | 0.210957  | -0.076969 |
| 10               | 6 | 0              | -0.479954               | 1.282656  | -0.151446 |
| 11               | 6 | 0              | -1.845612               | 1.072746  | -0.222021 |
| 12               | 6 | 0              | -2.406019               | -0.210376 | -0.211180 |
| 13               | 6 | 0              | -1.496289               | -1.257559 | -0.079654 |
| 14               | 6 | 0              | -0.122802               | -1.056301 | 0.025014  |
| 15               | 6 | 0              | 0.660297                | -2.306556 | 0.280600  |
| 16               | 6 | 0              | -0.029792               | 2.710190  | -0.211608 |
| 17               | 6 | 0              | -3.858263               | -0.434206 | -0.304315 |
| 18               | 6 | 0              | -4.376749               | -1.597752 | -0.907824 |
| 19               | 6 | 0              | -5.741442               | -1.810861 | -1.000391 |
| 20               | 6 | 0              | -6.640842               | -0.866569 | -0.477743 |
| 21               | 6 | 0              | -6.146182               | 0.293938  | 0.132719  |
| 22               | 6 | 0              | -4.770798               | 0.499765  | 0.208696  |
| 23               | 6 | 0              | 0.898925                | -3.211705 | -0.761055 |
| 24               | 6 | 0              | 1.480326                | -4.449793 | -0.500224 |
| 25               | 6 | 0              | 1.797264                | -4.772290 | 0.814698  |
| 26               | 6 | 0              | 1.528923                | -3.911422 | 1.871053  |
| 27               | 6 | 0              | 0.942651                | -2.674590 | 1.604187  |
| 28               | 6 | 0              | 0.551941                | 3.356822  | 0.893233  |
| 29               | 6 | 0              | 0.833560                | 4.719860  | 0.831487  |
| 30               | 6 | 0              | 0.530981                | 5.426470  | -0.326667 |
| 31               | 6 | 0              | -0.053879               | 4.817172  | -1.429871 |
| 32               | 6 | 0              | -0.341236               | 3.455727  | -1.360200 |
| 33               | 9 | 0              | 2.362135                | -5.971166 | 1.071299  |
| 34               | 9 | 0              | 0.806780                | 6.744432  | -0.382029 |
| 35               | 8 | 0              | 4.031406                | 0.518530  | 0.764136  |
| 36               | 6 | 0              | 4.403092                | 0.609771  | 2.149842  |
| 37               | 8 | 0              | 1.535035                | -0.830041 | -2.827923 |
| 38               | 6 | 0              | 1.638823                | -1.481313 | -4.080789 |
| 39               | 8 | 0              | -7.957351               | -1.169076 | -0.612779 |



|    |   |   |           |           |           |
|----|---|---|-----------|-----------|-----------|
| 40 | 6 | 0 | -8.920996 | -0.257468 | -0.098471 |
| 41 | 1 | 0 | 3.255600  | 0.236484  | -3.285518 |
| 42 | 1 | 0 | 1.480324  | 1.498030  | -2.069028 |
| 43 | 1 | 0 | 1.899928  | 1.460872  | 0.525396  |
| 44 | 1 | 0 | 2.556957  | -0.773503 | 1.425948  |
| 45 | 1 | 0 | 3.578799  | -2.133433 | -2.152611 |
| 46 | 1 | 0 | 5.358751  | 0.272063  | -1.488490 |
| 47 | 1 | 0 | 5.780350  | -1.422695 | -1.183517 |
| 48 | 1 | 0 | 5.504622  | -0.857470 | -2.843936 |
| 49 | 1 | 0 | 3.859273  | 1.754075  | -0.637528 |
| 50 | 1 | 0 | -2.474674 | 1.949791  | -0.299858 |
| 51 | 1 | 0 | -1.843808 | -2.276561 | 0.025919  |
| 52 | 1 | 0 | -3.699715 | -2.330655 | -1.335150 |
| 53 | 1 | 0 | -6.142221 | -2.699168 | -1.476449 |
| 54 | 1 | 0 | -6.816602 | 1.030405  | 0.558039  |
| 55 | 1 | 0 | -4.405967 | 1.388161  | 0.714174  |
| 56 | 1 | 0 | 0.651037  | -2.932732 | -1.777569 |
| 57 | 1 | 0 | 1.686062  | -5.161812 | -1.292022 |
| 58 | 1 | 0 | 1.760497  | -4.218392 | 2.885232  |
| 59 | 1 | 0 | 0.657689  | -1.988656 | 2.400119  |
| 60 | 1 | 0 | 0.789822  | 2.781572  | 1.789900  |
| 61 | 1 | 0 | 1.280493  | 5.237806  | 1.673028  |
| 62 | 1 | 0 | -0.275425 | 5.401643  | -2.315691 |
| 63 | 1 | 0 | -0.804169 | 2.965618  | -2.211720 |
| 64 | 1 | 0 | 5.216014  | 1.337224  | 2.199906  |
| 65 | 1 | 0 | 3.550845  | 0.937443  | 2.753634  |
| 66 | 1 | 0 | 4.771157  | -0.360684 | 2.506015  |
| 67 | 1 | 0 | 0.655598  | -1.900165 | -4.309628 |
| 68 | 1 | 0 | 1.917891  | -0.775909 | -4.877408 |
| 69 | 1 | 0 | 2.373169  | -2.299855 | -4.071186 |
| 70 | 1 | 0 | -9.894187 | -0.699911 | -0.312696 |
| 71 | 1 | 0 | -8.812565 | -0.127425 | 0.984986  |
| 72 | 1 | 0 | -8.851522 | 0.720541  | -0.589986 |
| 73 | 6 | 0 | 0.061136  | 1.091690  | 4.807525  |
| 74 | 6 | 0 | 0.336747  | 0.574209  | 3.384707  |
| 75 | 8 | 0 | 1.332890  | 1.095856  | 2.783865  |
| 76 | 8 | 0 | -0.439005 | -0.295398 | 2.915982  |
| 77 | 1 | 0 | 0.985590  | 1.095493  | 5.393672  |
| 78 | 1 | 0 | -0.287873 | 2.130228  | 4.759716  |
| 79 | 1 | 0 | -0.697381 | 0.487773  | 5.310187  |

-----  
E(B3LYP) = -2097.65983455 a.u.

Imaginary frequencies: 0

6. **Figure S2.** Scheme of calculated tripod-type interaction CH–anion for compound **9** (distance in Å) at two points of view.

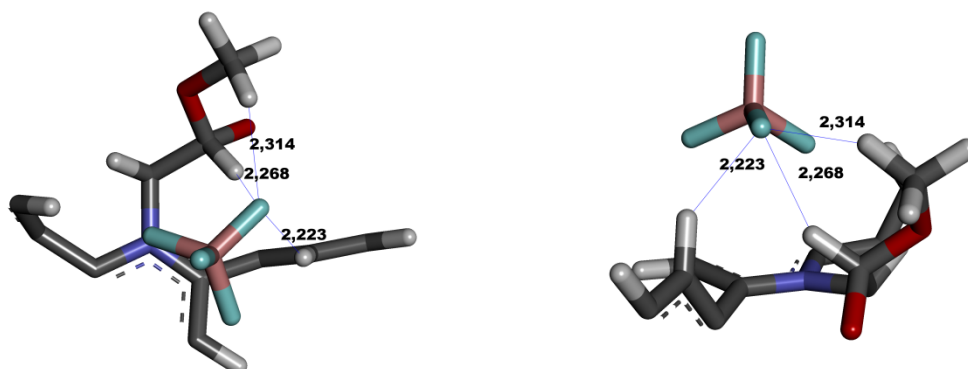

7. **Figure S3.** Molecular orbital and energies for HOMO-LUMO of NLO-phore **10**.

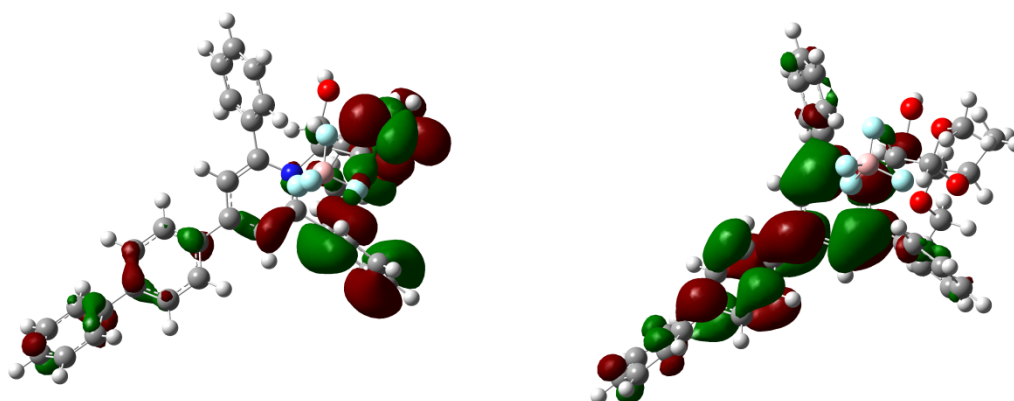

HOMO (**10**): -6.46 eV

LUMO (**10**): -2.69 eV

## 8. $^1\text{H}$ , $^{19}\text{F}$ , diffusion experiment and $^{13}\text{C}$ CPMAS NMR spectra of new compounds

Figure S4. Compound 7 (pH 4.3):  $^1\text{H}$  NMR spectrum ( $\text{CD}_3\text{COOD}/\text{D}_2\text{O}$  700 MHz)

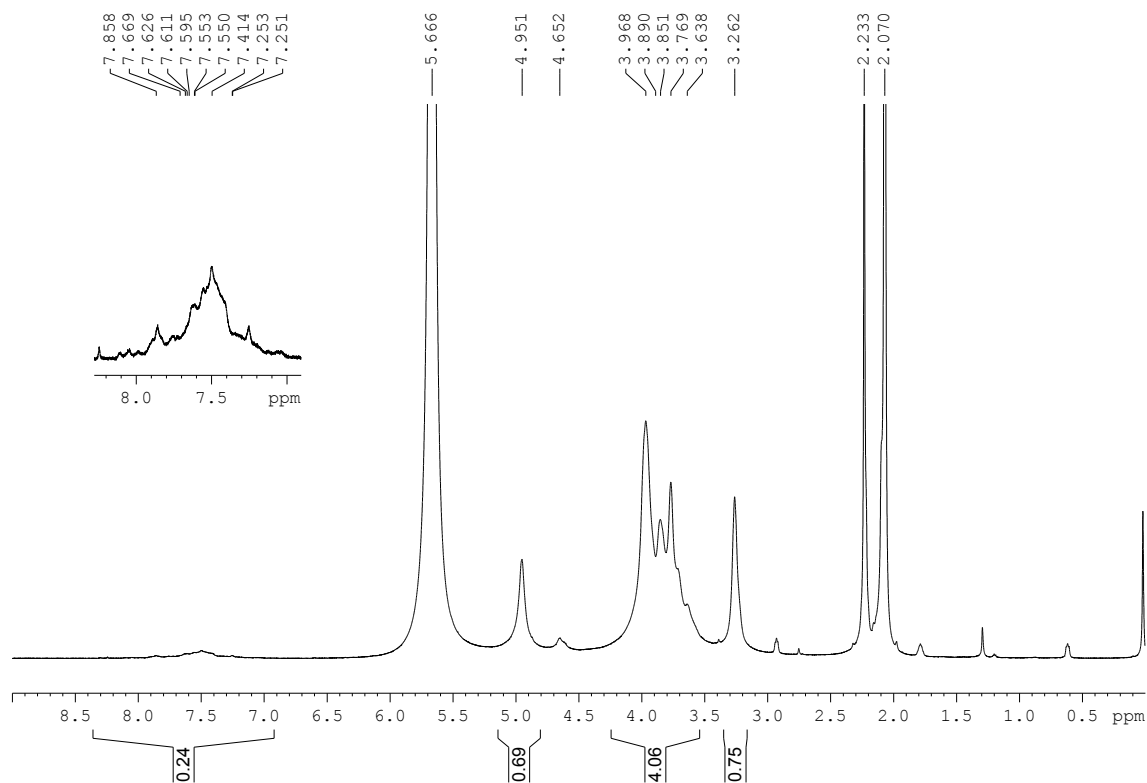

Figure S5. Compound 7 (pH 5.1):  $^1\text{H}$  NMR spectrum ( $\text{CD}_3\text{COOD}/\text{D}_2\text{O}$  700 MHz)

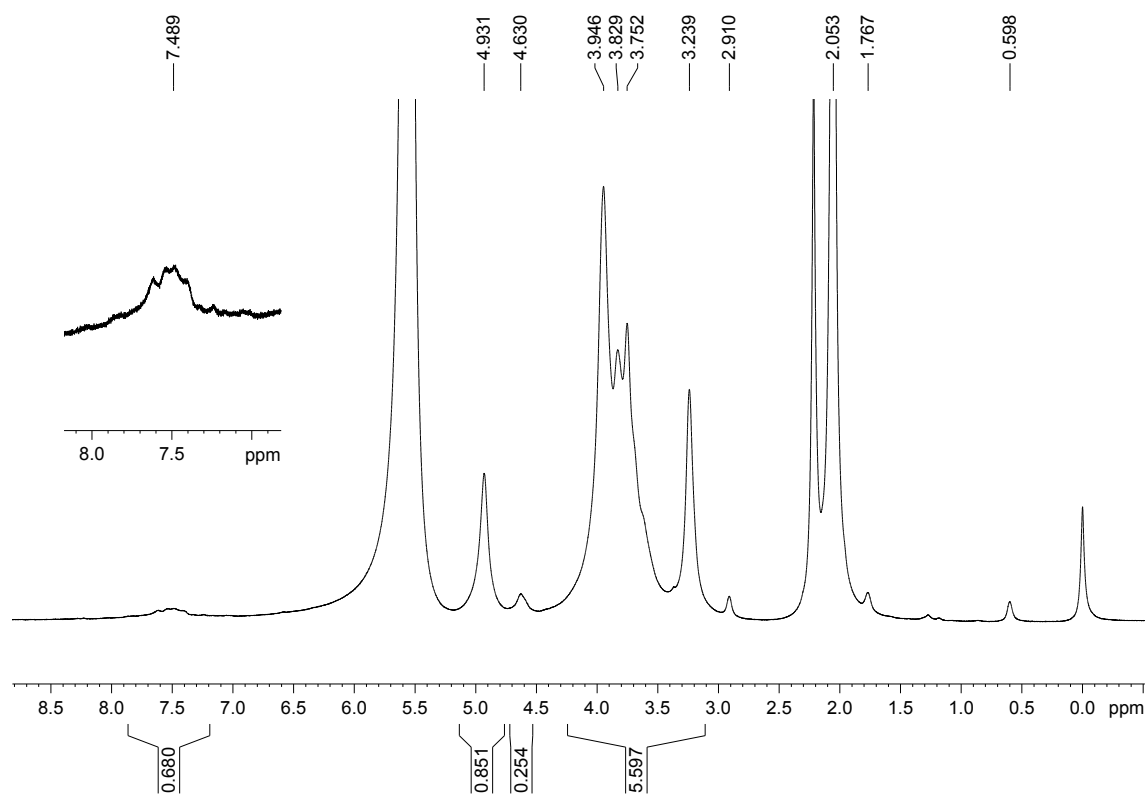

**Figure S6.** Compound 7:  $^{13}\text{C}$  CPMAS NMR spectrum

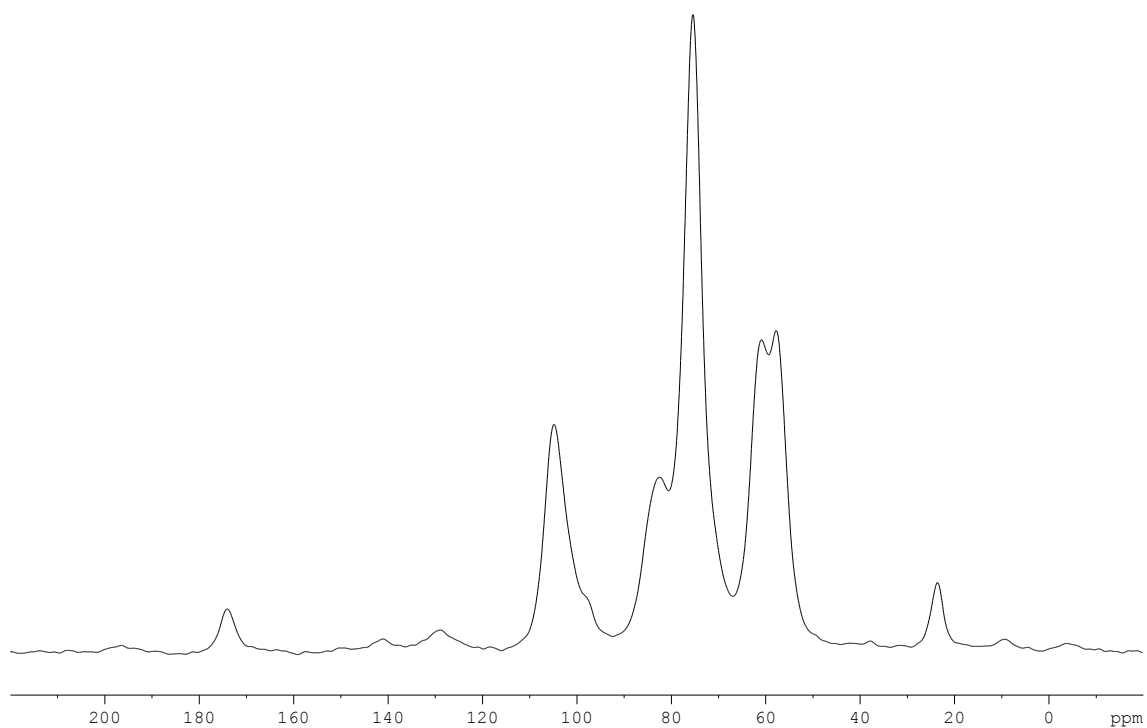

**Figure S7.** Compound 7: Diffusion-filtered  $^1\text{H}$  NMR spectrum ( $\text{CD}_3\text{COOD}/\text{D}_2\text{O}$  500 MHz)

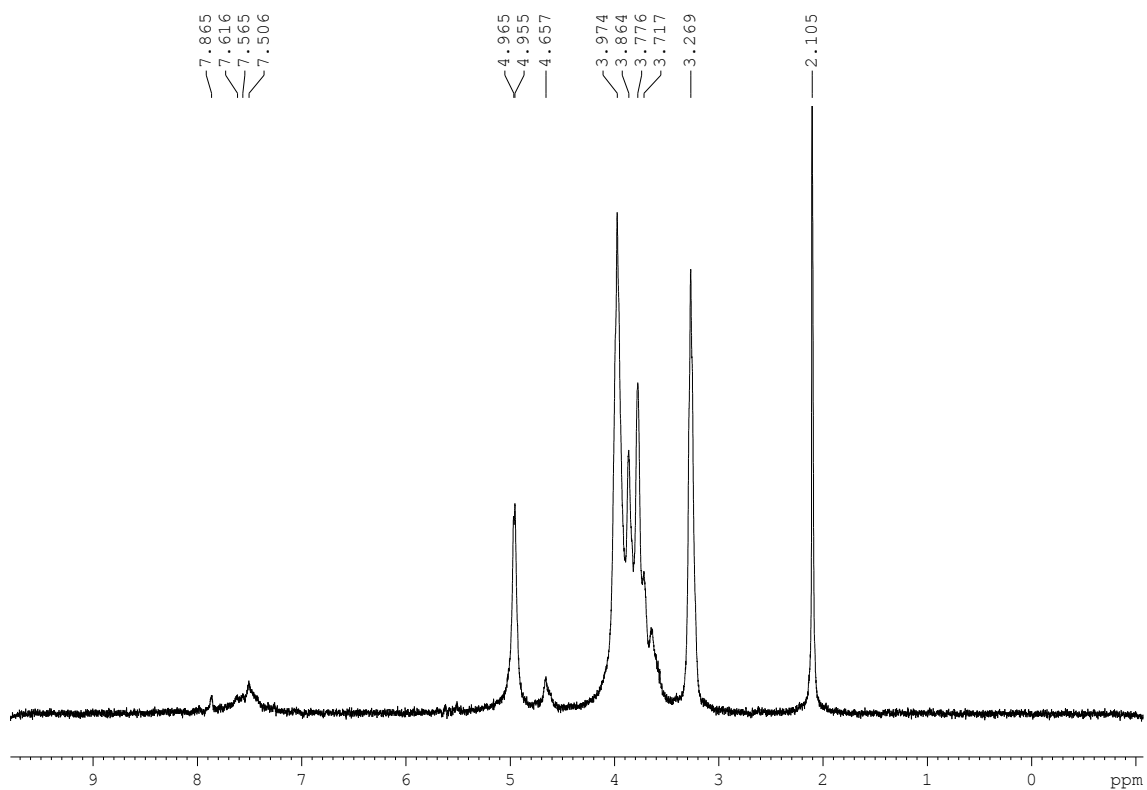

**Figure S8.** Compound 7:  $^{19}\text{F}$  NMR spectrum ( $\text{CD}_3\text{COOD}/\text{D}_2\text{O}$  500 MHz)

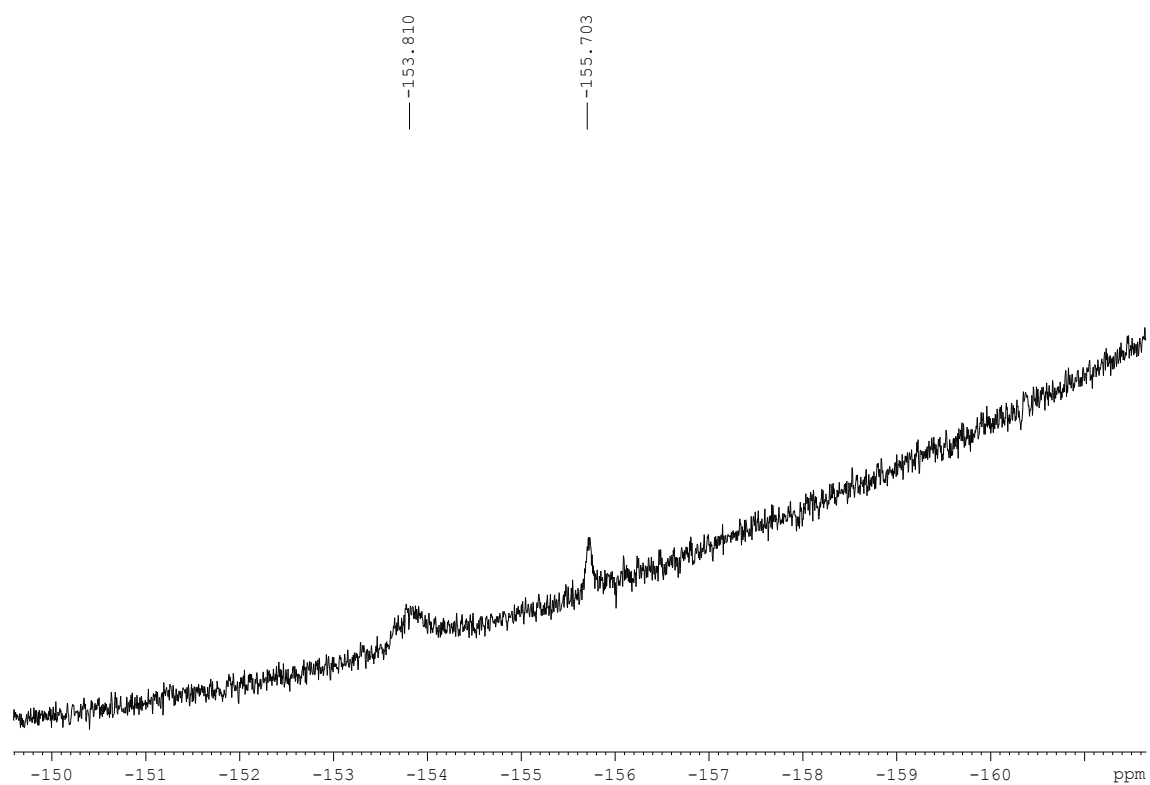

**Figure S9.** Compound 8 (pH 4.2):  $^1\text{H}$  NMR spectrum ( $\text{CD}_3\text{COOD}/\text{D}_2\text{O}$  700 MHz)

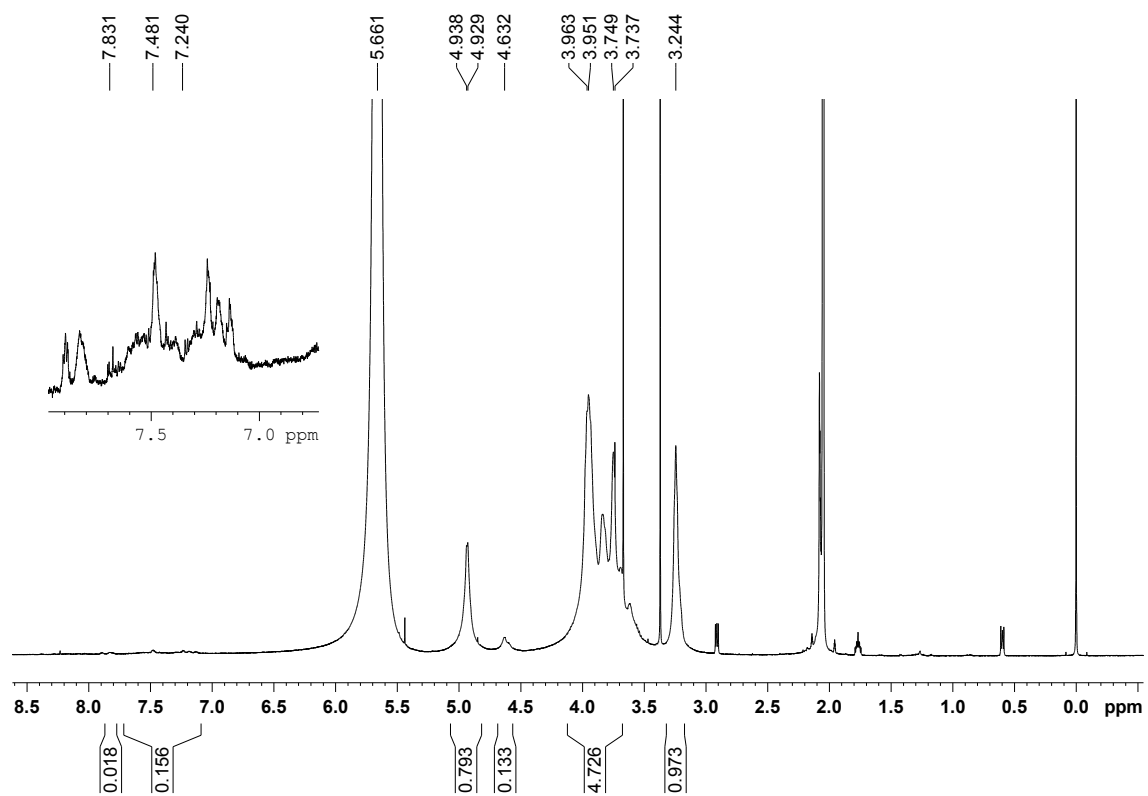

**Figure S10.** Compound **8** (pH 5.1):  $^1\text{H}$  NMR spectrum ( $\text{CD}_3\text{COOD}/\text{D}_2\text{O}$  700 MHz)

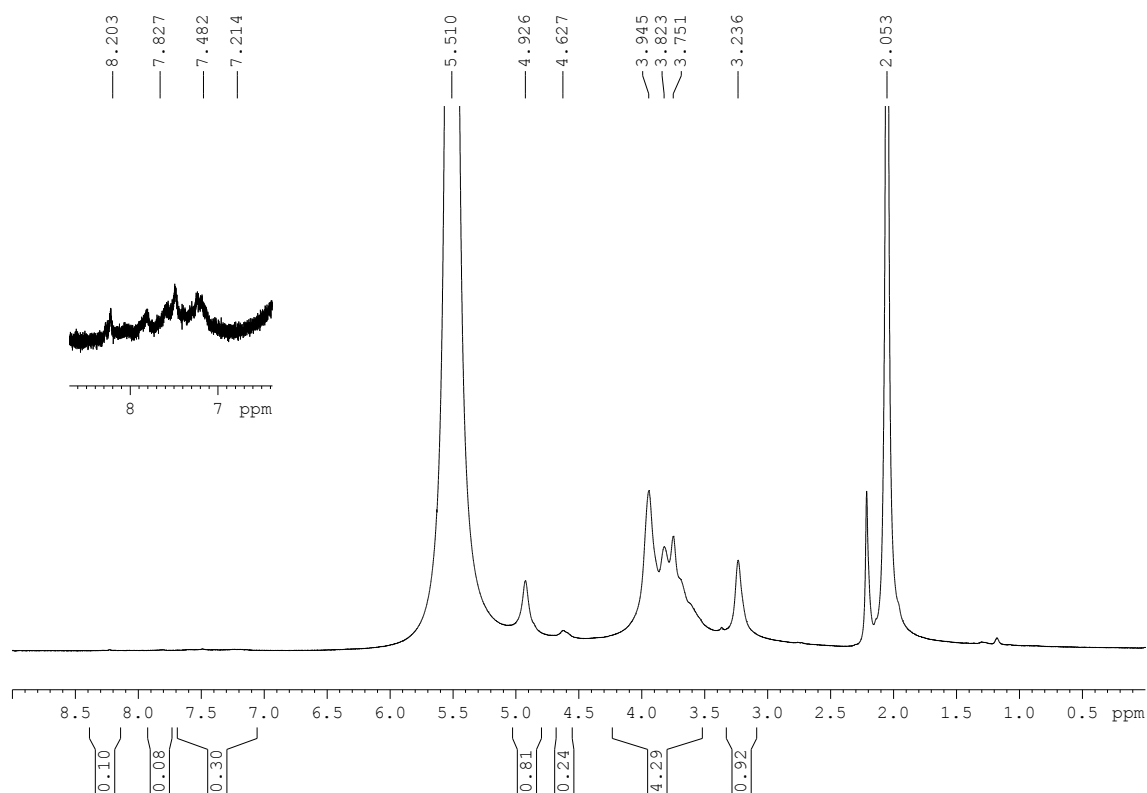

**Figure S11.** Compound **8**: Diffusion-filtered  $^1\text{H}$  NMR spectrum ( $\text{CD}_3\text{COOD}/\text{D}_2\text{O}$  500 MHz)

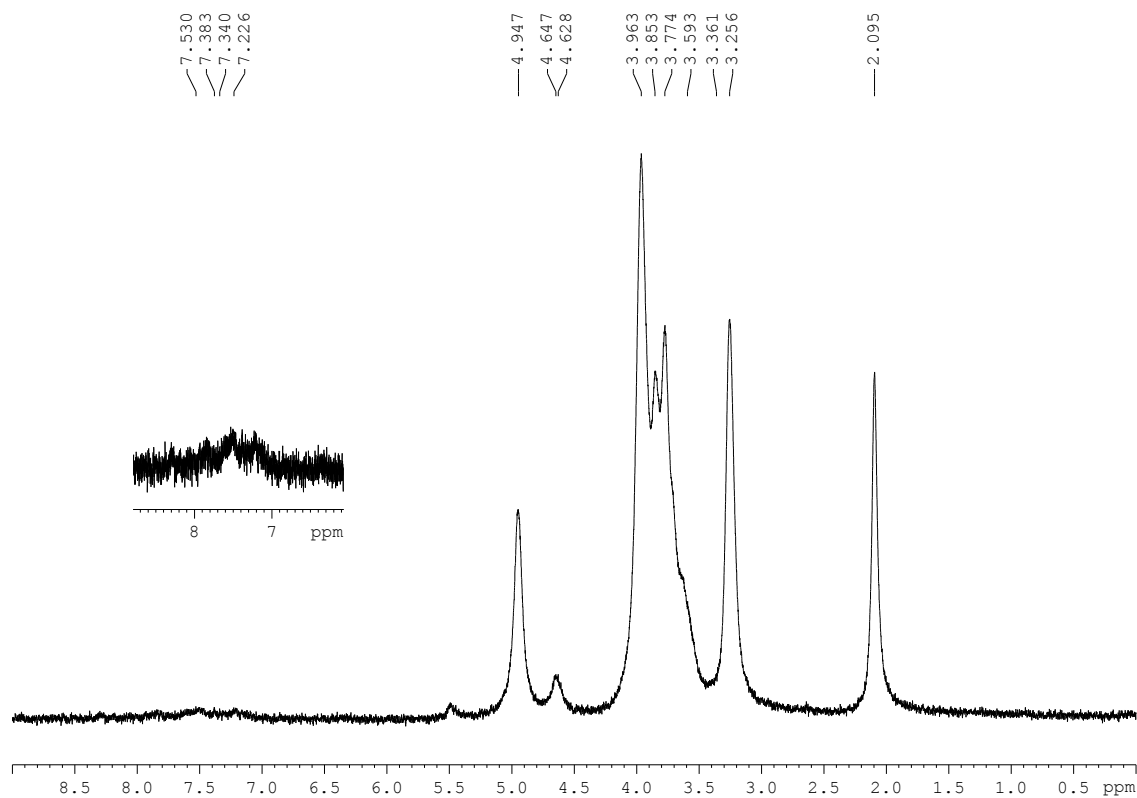

**Figure S12.** Compound **8**:  $^{13}\text{C}$  CPMAS NMR spectrum

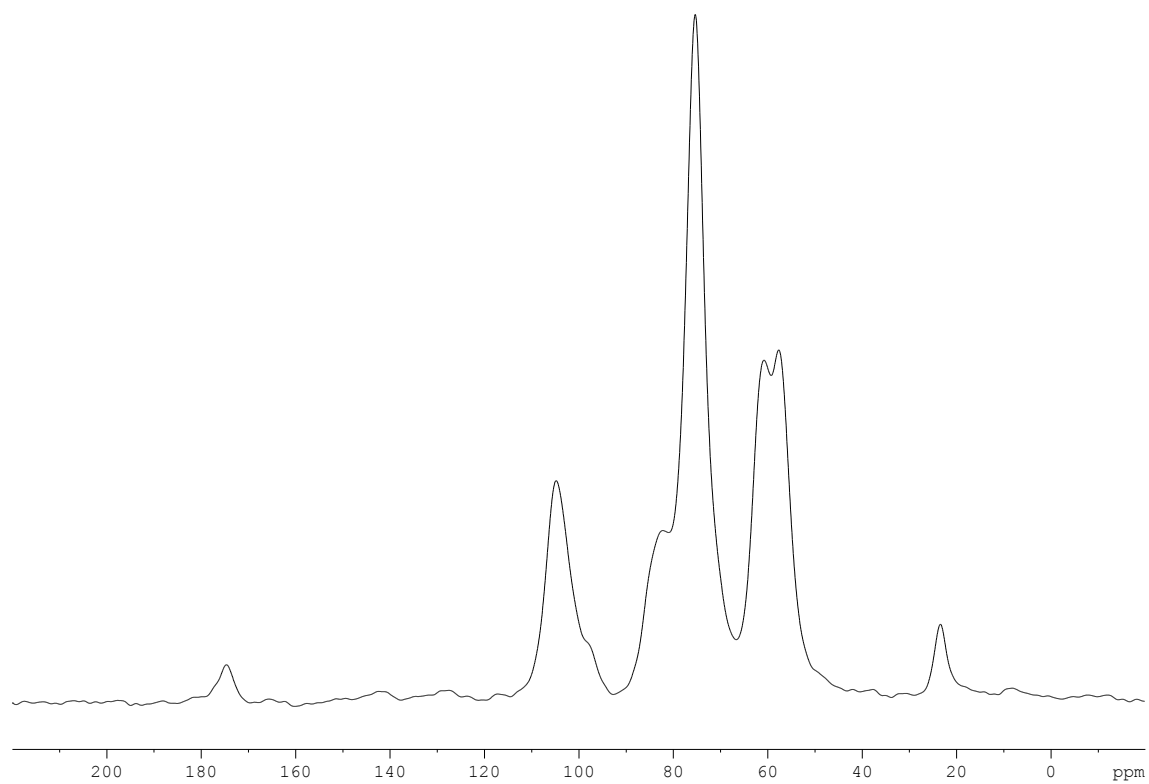

**Figure S13.** Compound **8**:  $^{19}\text{F}$  NMR spectrum ( $\text{CD}_3\text{COOD}/\text{D}_2\text{O}$  500 MHz)

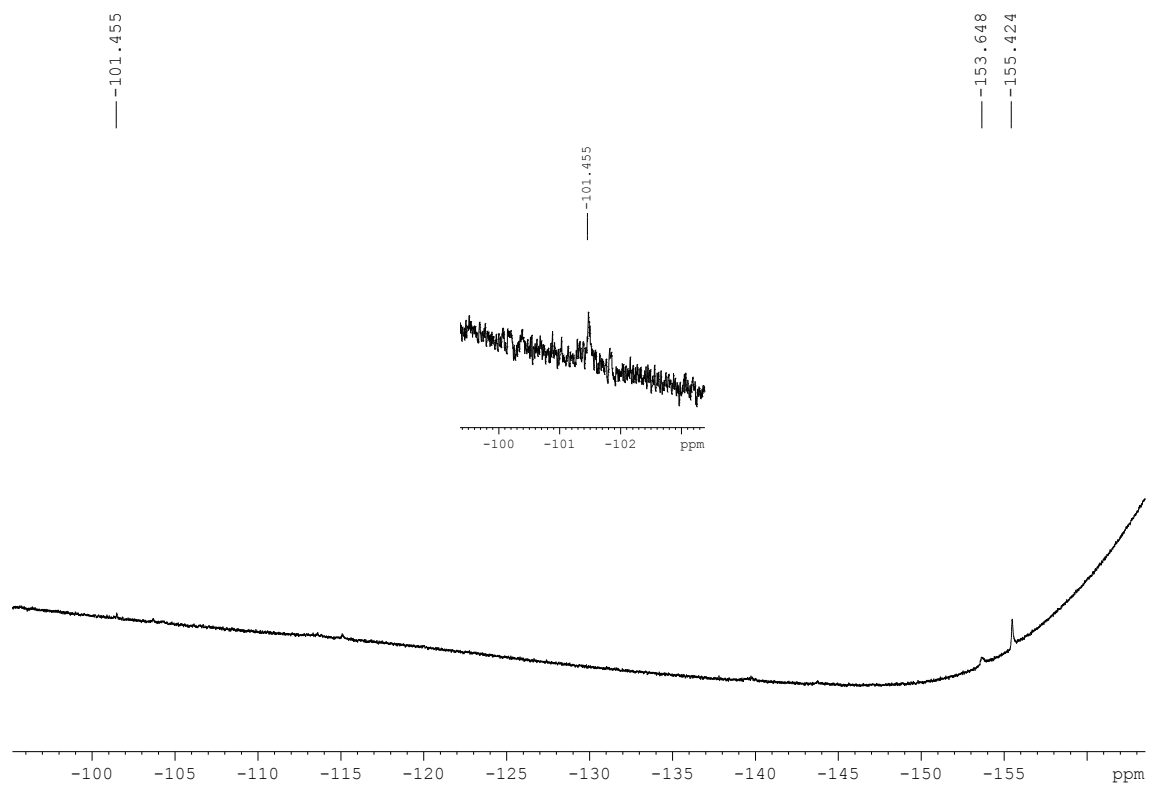

**Figure S14.** Compound **9**:  $^1\text{H}$  NMR spectrum ( $\text{CD}_3\text{COOD}/\text{D}_2\text{O}$  700 MHz)

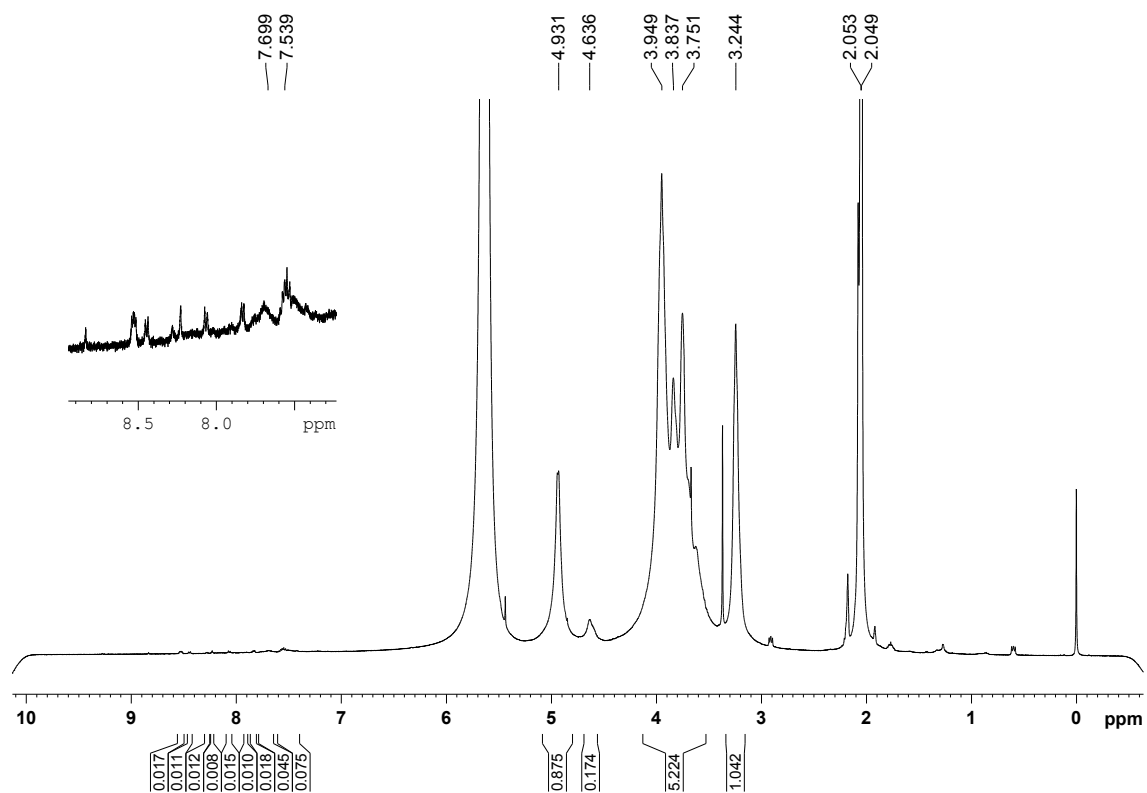

**Figure S15.** Compound **9**: Diffusion-filtered  $^1\text{H}$  NMR spectrum ( $\text{CD}_3\text{COOD}/\text{D}_2\text{O}$  500 MHz)

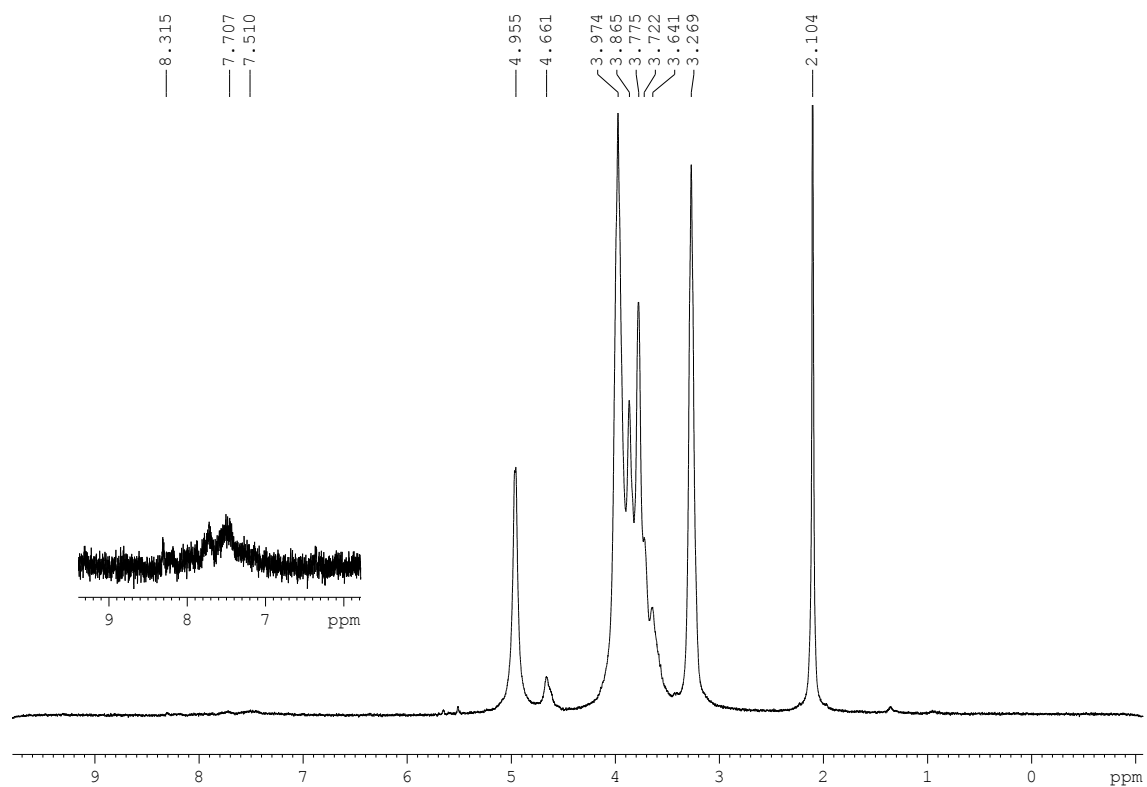



**Figure S16.** Compound **9**:  $^{13}\text{C}$  CPMAS NMR spectrum

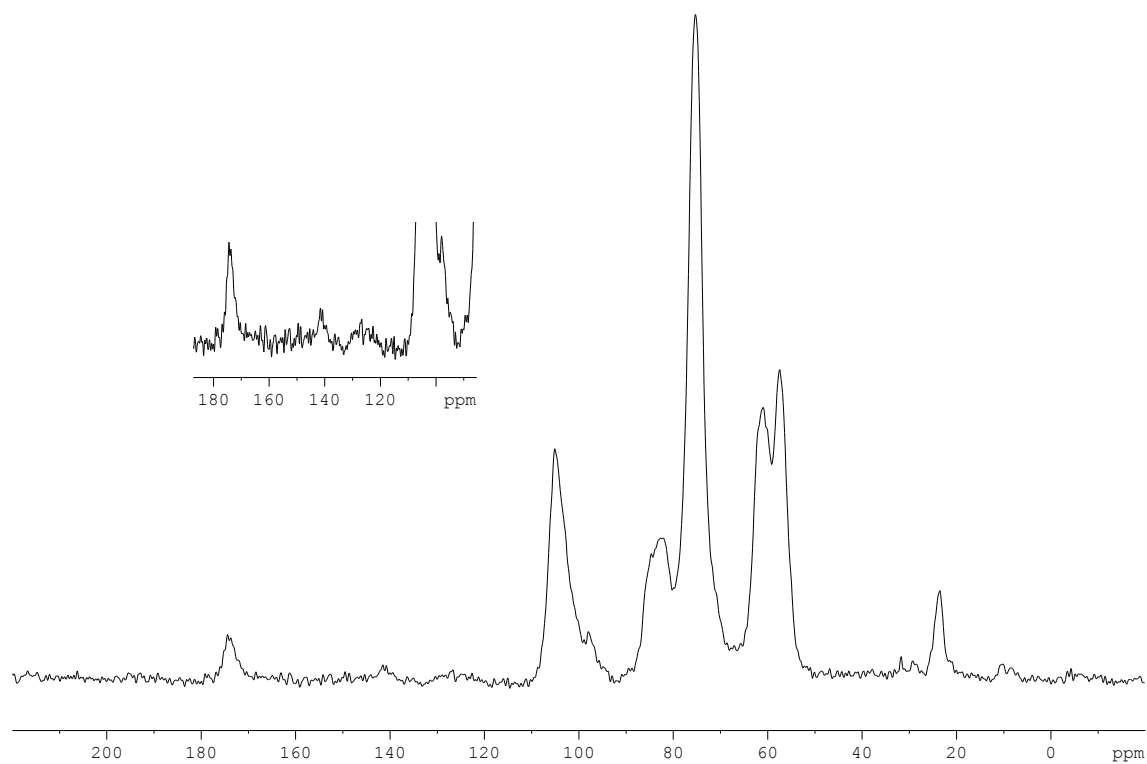

**Figure S17.** Compound **9**:  $^{19}\text{F}$  NMR spectrum ( $\text{CD}_3\text{COOD}/\text{D}_2\text{O}$  500 MHz)

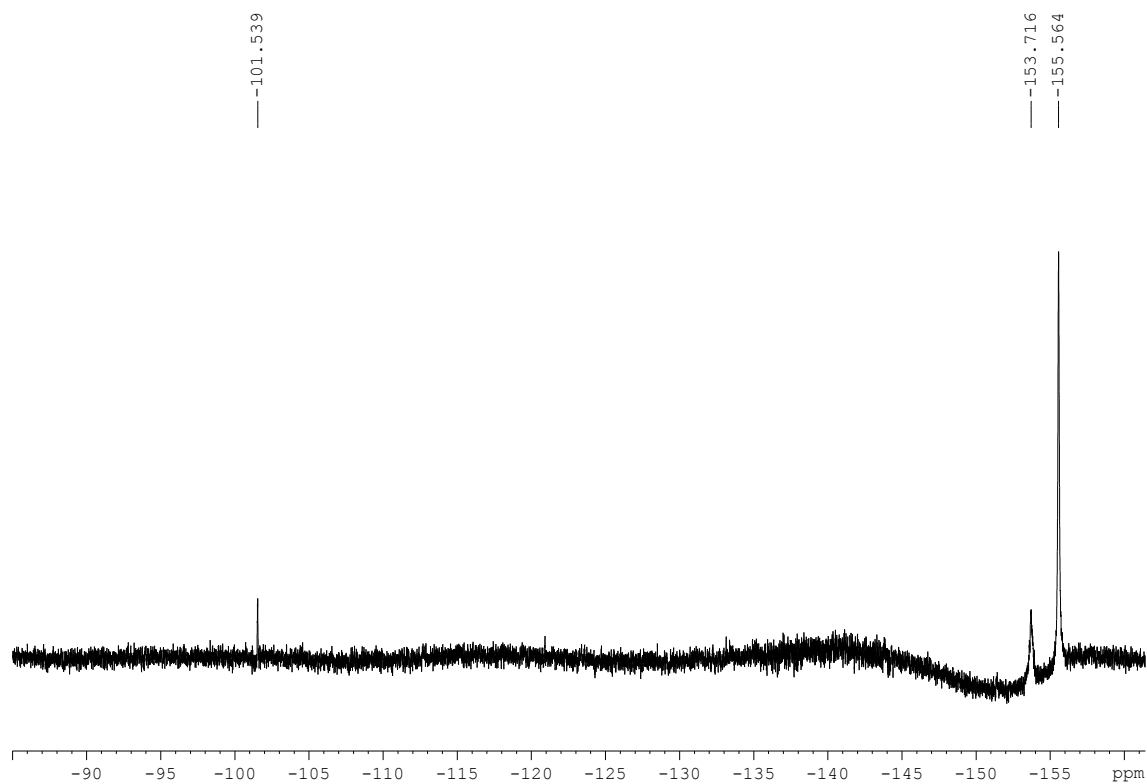

**Figure S18.** Compound **10**:  $^1\text{H}$  NMR spectrum ( $\text{CD}_3\text{COOD}/\text{D}_2\text{O}$  700 MHz)

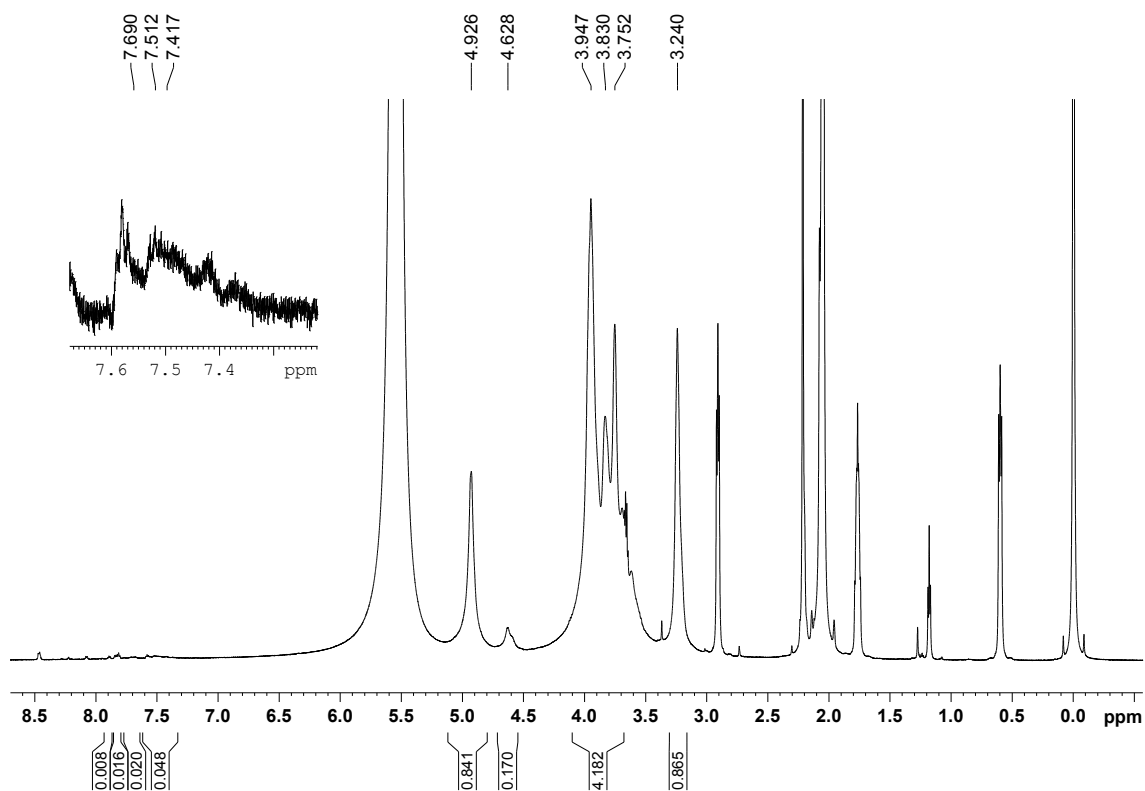

**Figure S19.** Compound **10**: Diffusion-filtered  $^1\text{H}$  NMR spectrum ( $\text{CD}_3\text{COOD}/\text{D}_2\text{O}$  500 MHz)

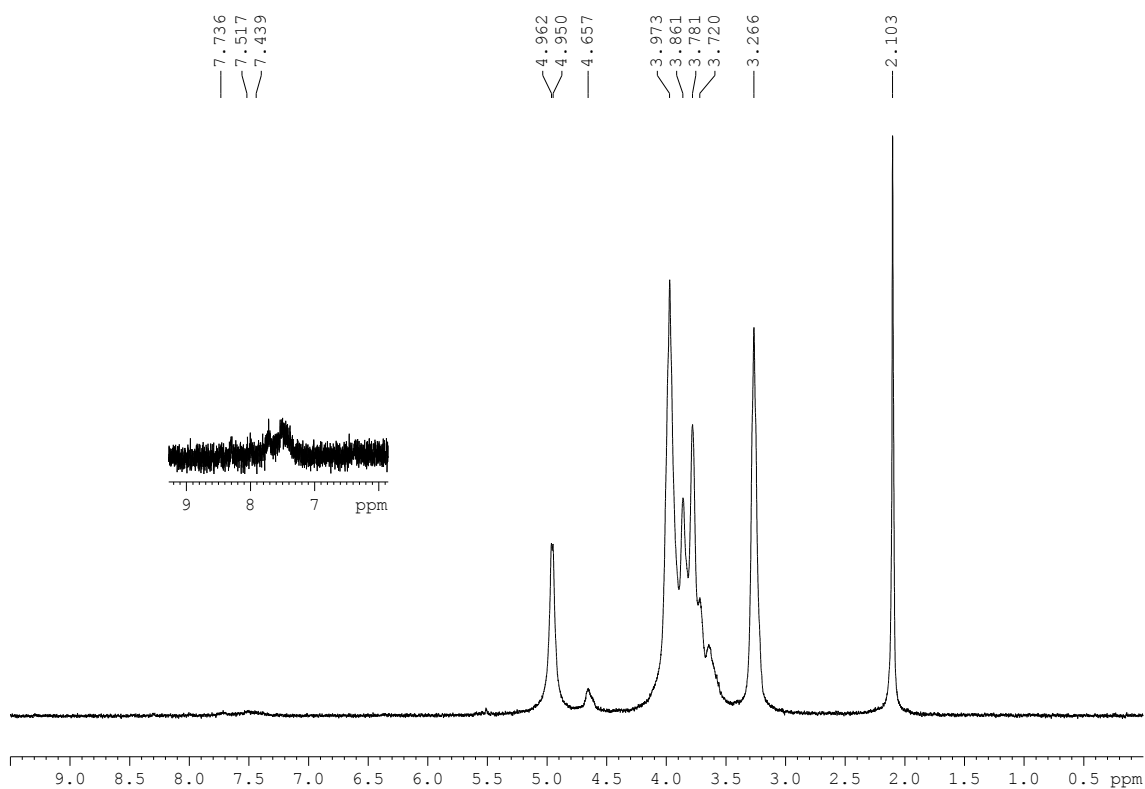

**Figure S20.** Compound **10**:  $^{13}\text{C}$  CPMAS NMR spectrum

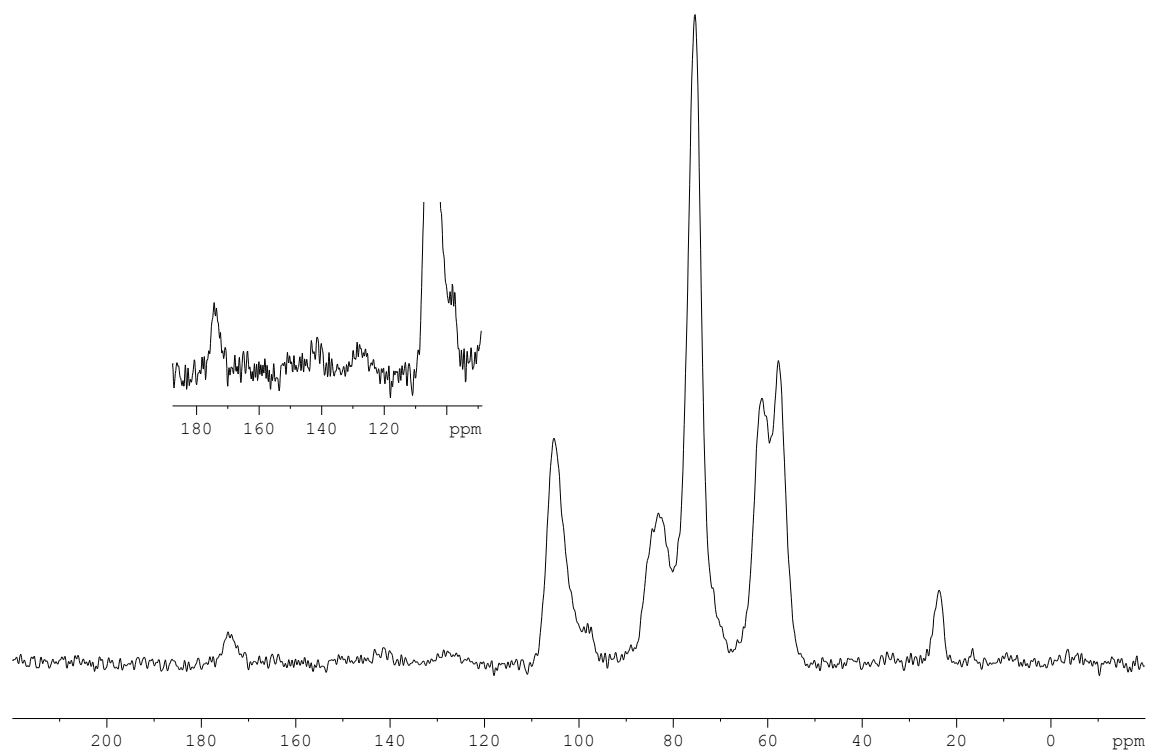

**Figure S21.** Compound **10**:  $^{19}\text{F}$  NMR spectrum ( $\text{CD}_3\text{COOD}/\text{D}_2\text{O}$  500 MHz)

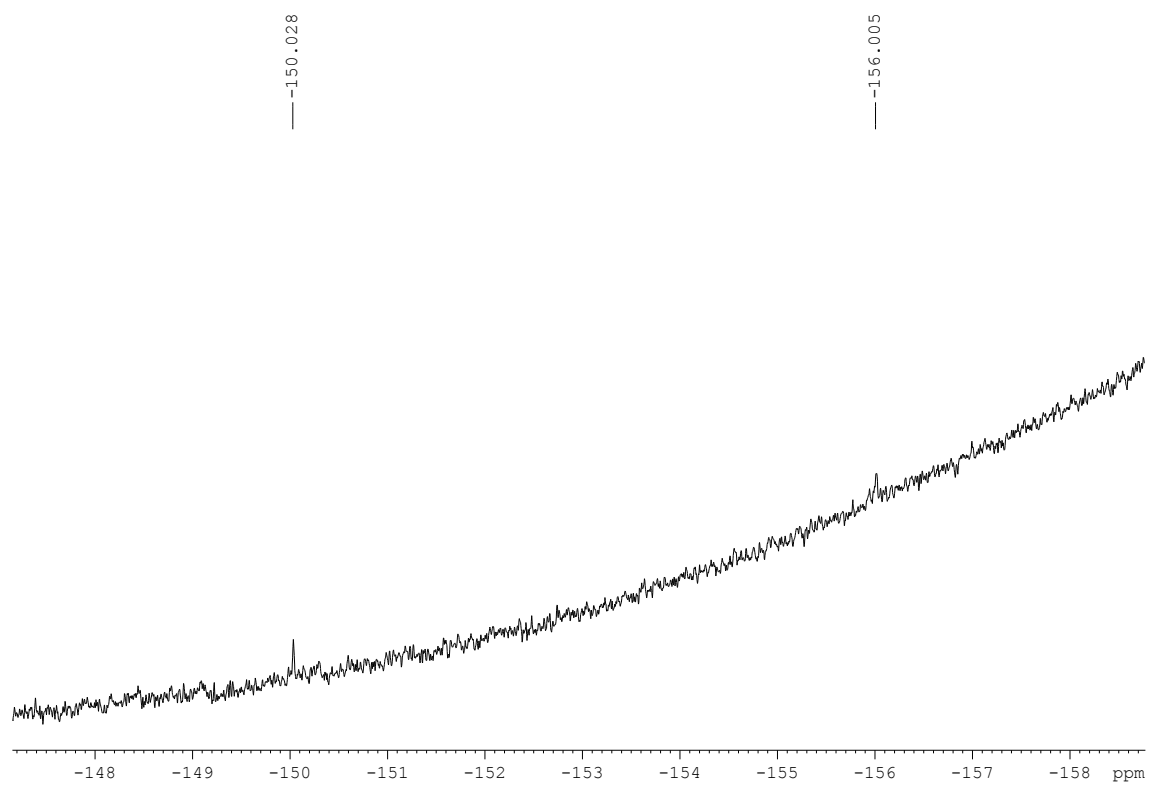

**Figure S22.** Compound **11**:  $^1\text{H}$  NMR spectrum ( $\text{CD}_3\text{COOD}/\text{D}_2\text{O}$  700 MHz)

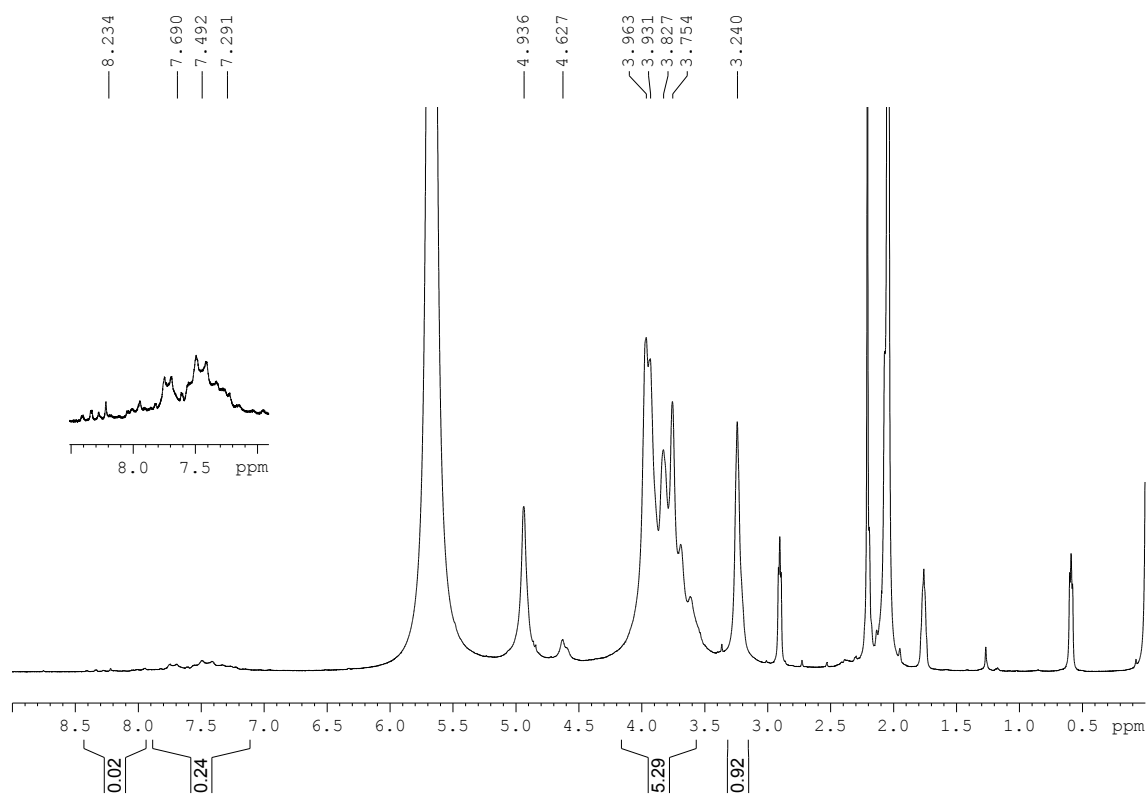

**Figure S23.** Compound **11**: Diffusion-filtered  $^1\text{H}$  NMR spectrum ( $\text{CD}_3\text{COOD}/\text{D}_2\text{O}$  500 MHz)

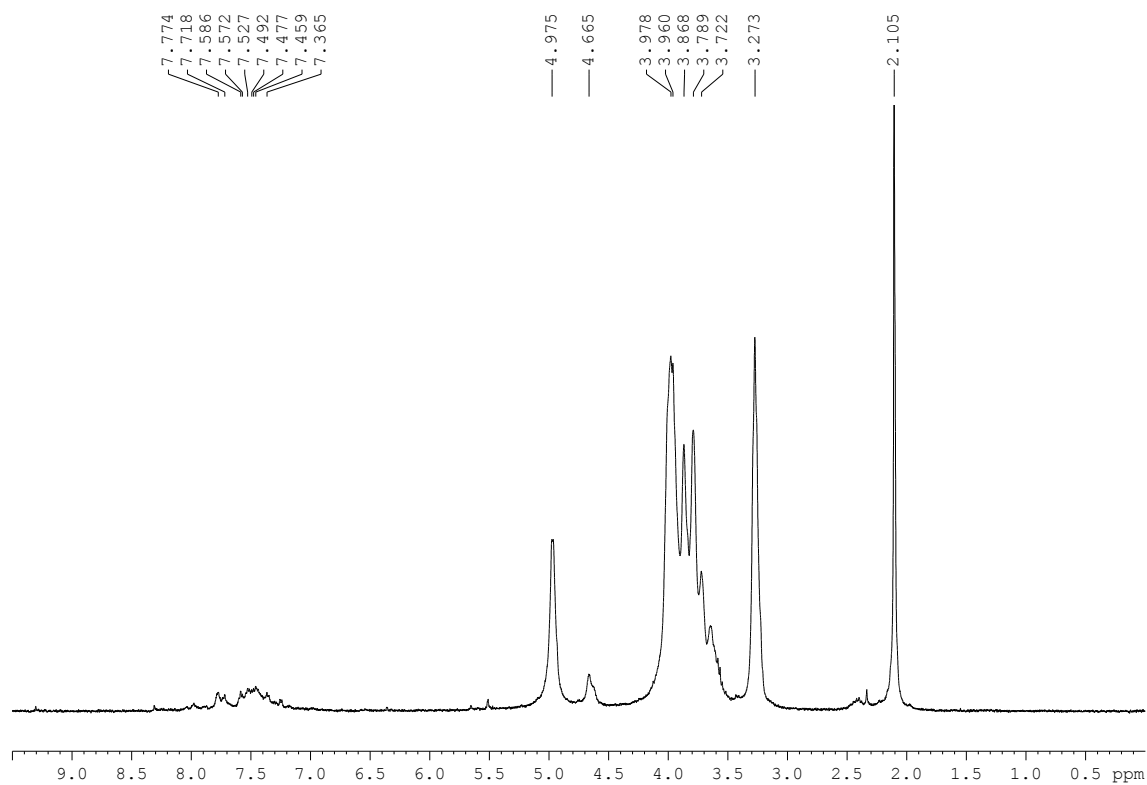

**Figure S24.** Compound 11:  $^{13}\text{C}$  CPMAS NMR spectrum

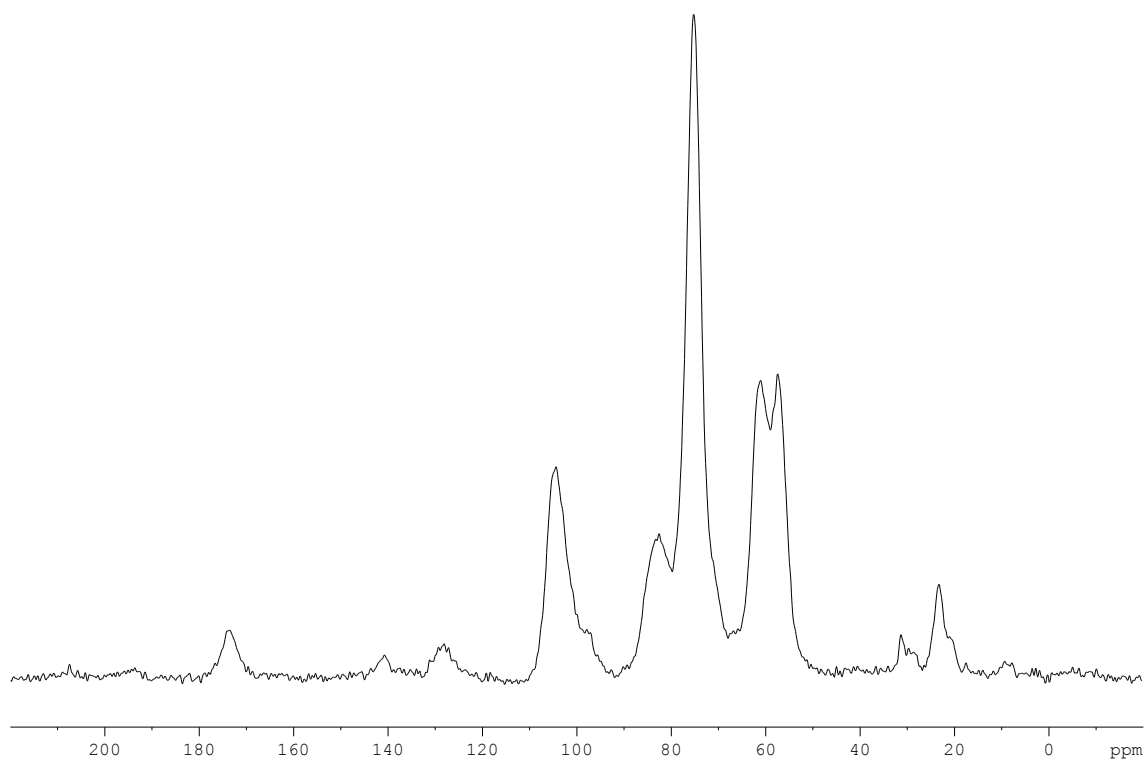

**Figure S25.** Compound 11:  $^{19}\text{F}$  NMR spectrum ( $\text{CD}_3\text{COOD}/\text{D}_2\text{O}$  500 MHz)

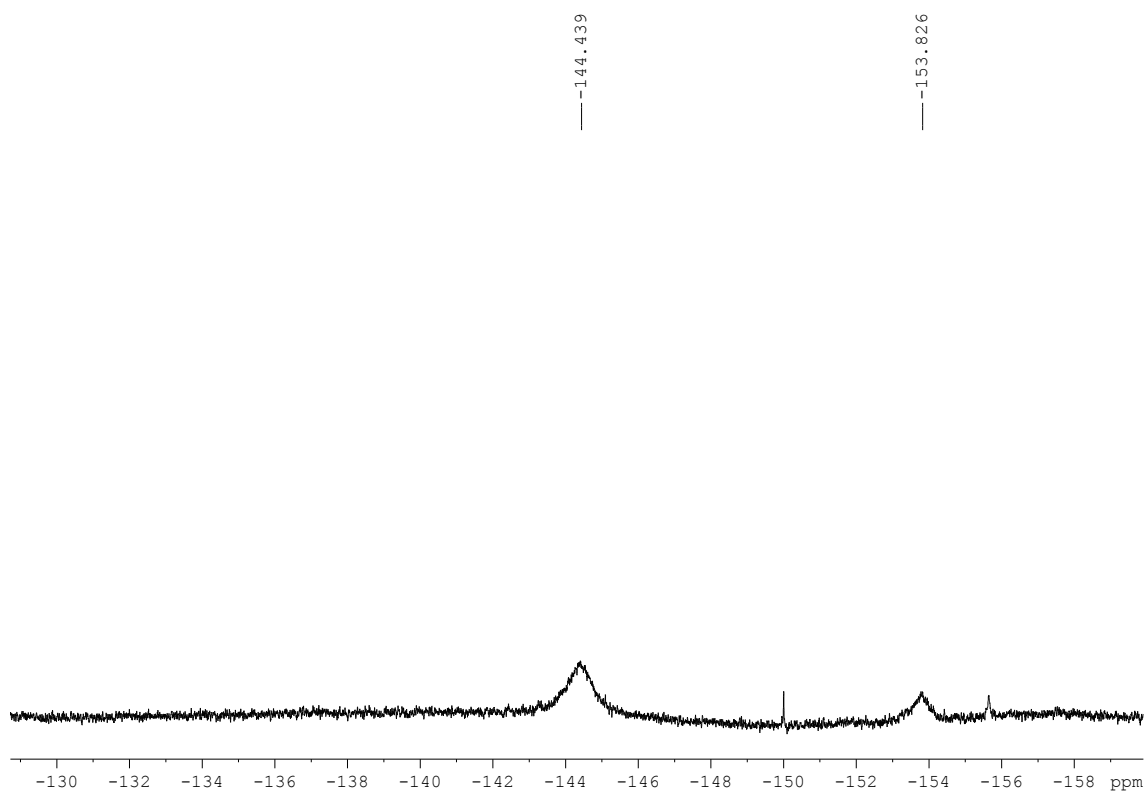

**Figure S26.** Compound **12**:  $^1\text{H}$  NMR spectrum ( $\text{CD}_3\text{COOD}/\text{D}_2\text{O}$  700 MHz)

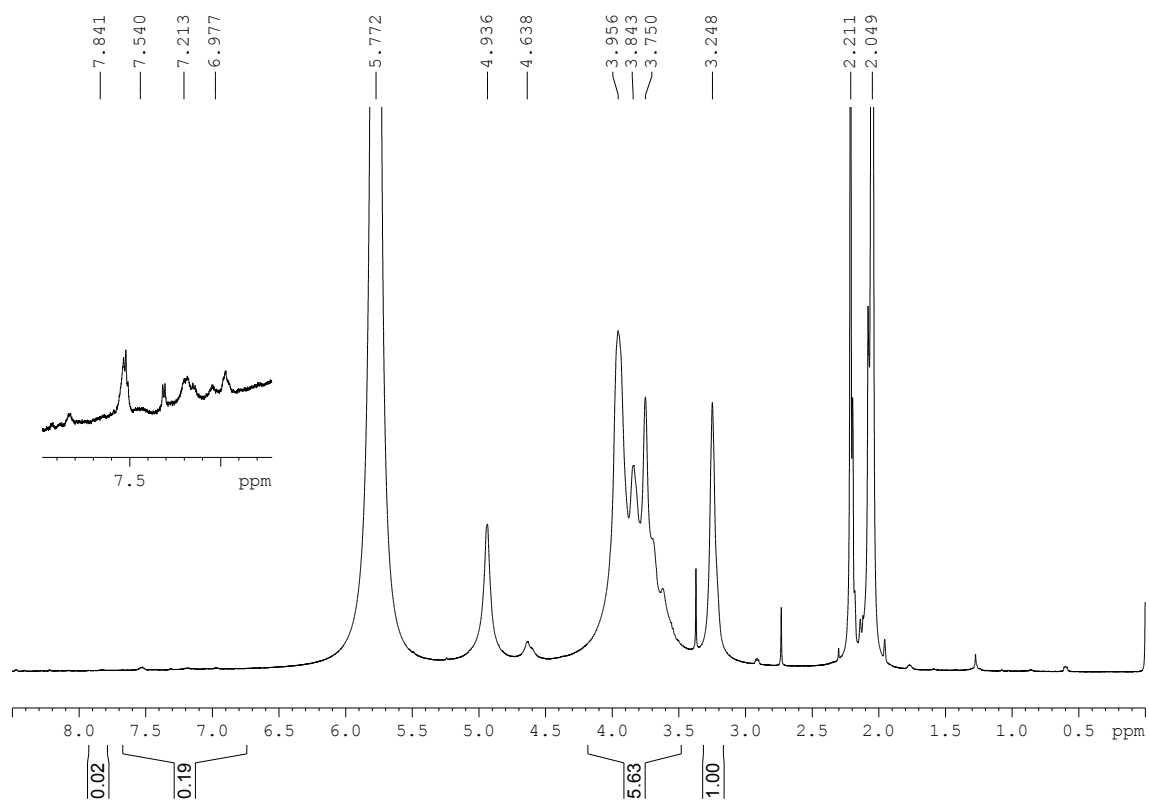

**Figure S27.** Compound **12**: Diffusion-filtered  $^1\text{H}$  NMR spectrum ( $\text{CD}_3\text{COOD}/\text{D}_2\text{O}$  500 MHz)

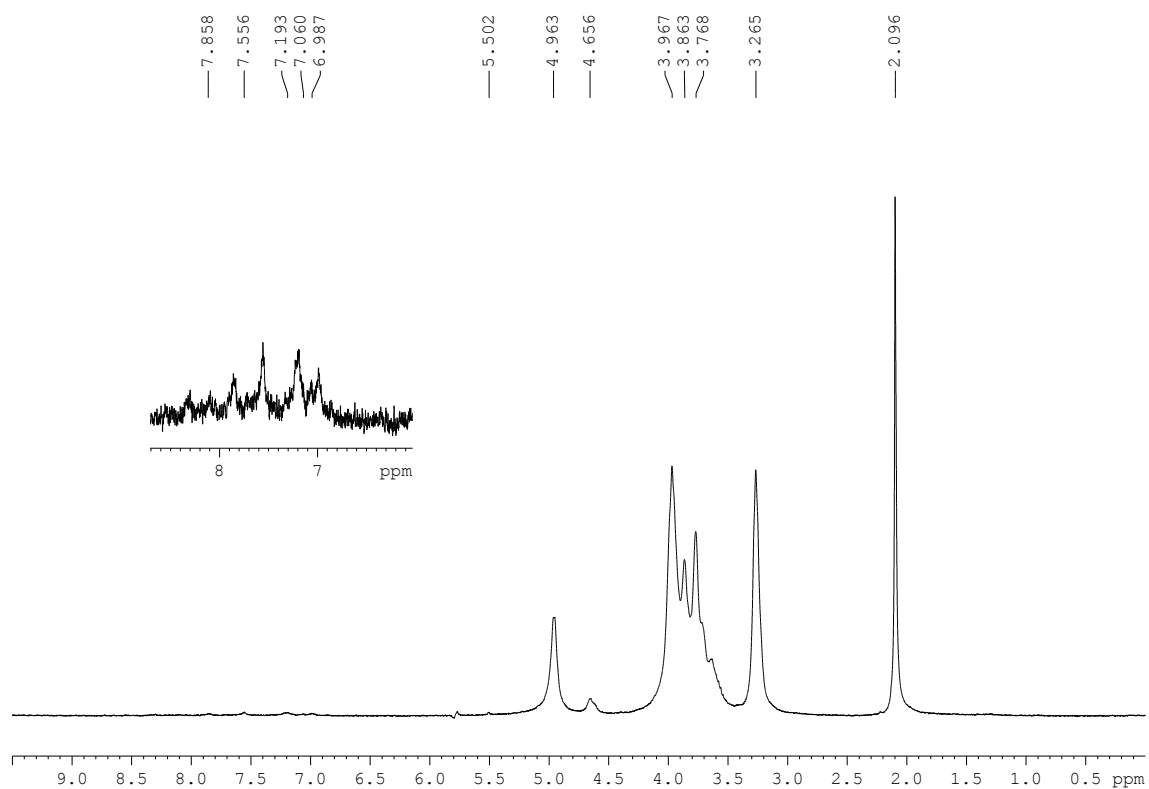

**Figure S28.** Compound **12a**:  $^1\text{H}$  NMR spectrum ( $\text{CD}_3\text{COOD}/\text{D}_2\text{O}$  700 MHz)

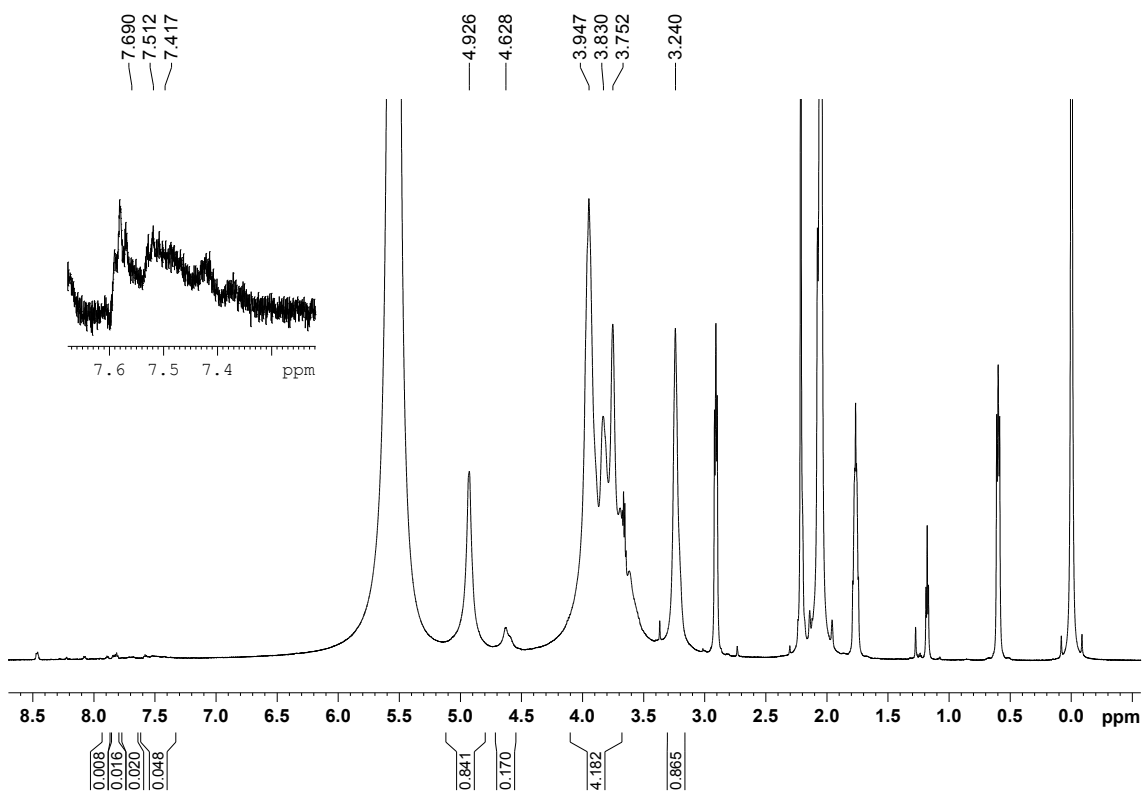

**Figure S29.** Compound **12a**: Diffusion-filtered  $^1\text{H}$  NMR spectrum ( $\text{CD}_3\text{COOD}/\text{D}_2\text{O}$  500 MHz)

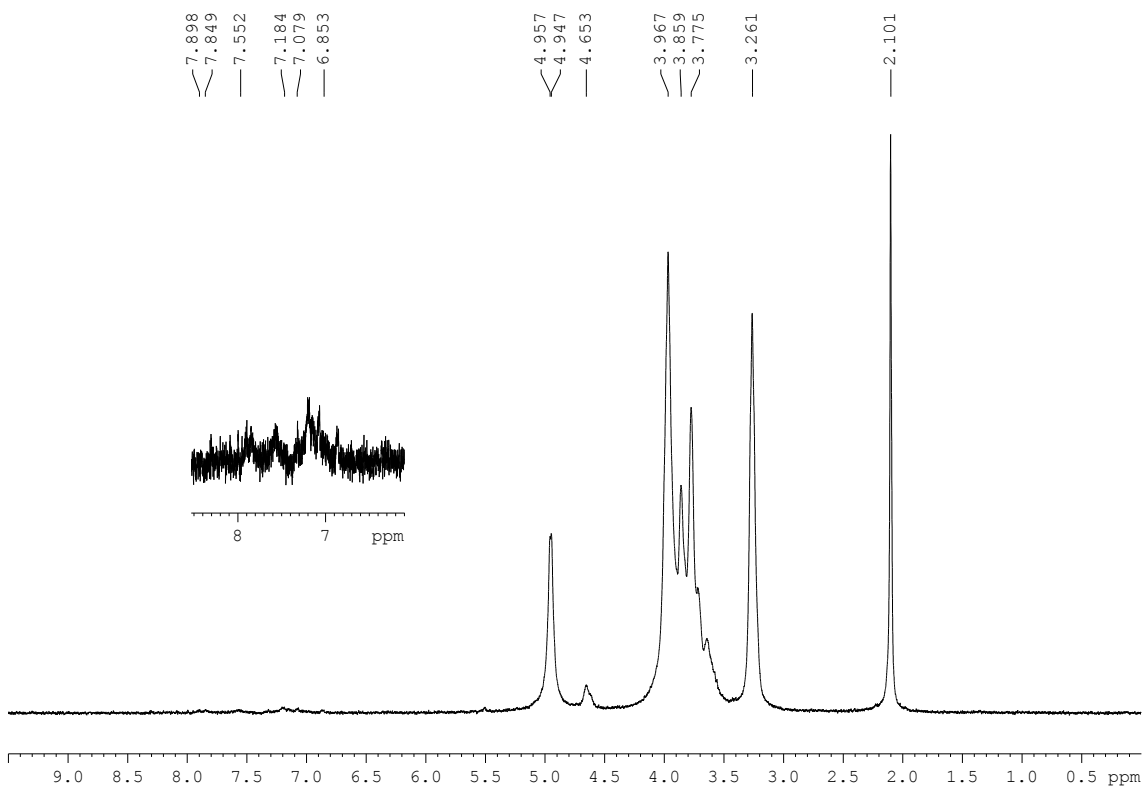

**Figure S30.** Compound **12a**:  $^{13}\text{C}$  CPMAS NMR spectrum

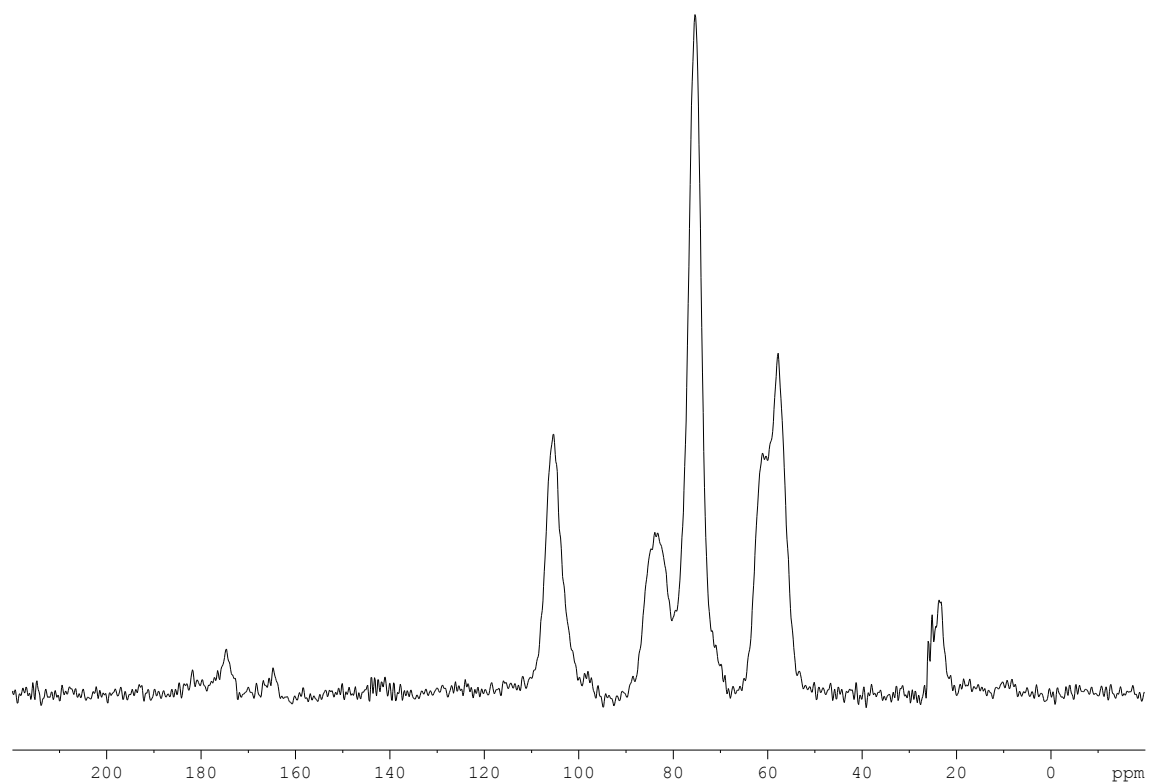

**Figure S31.** Compound **12a**:  $^{19}\text{F}$  NMR spectrum ( $\text{CD}_3\text{COOD}/\text{D}_2\text{O}$  500 MHz)

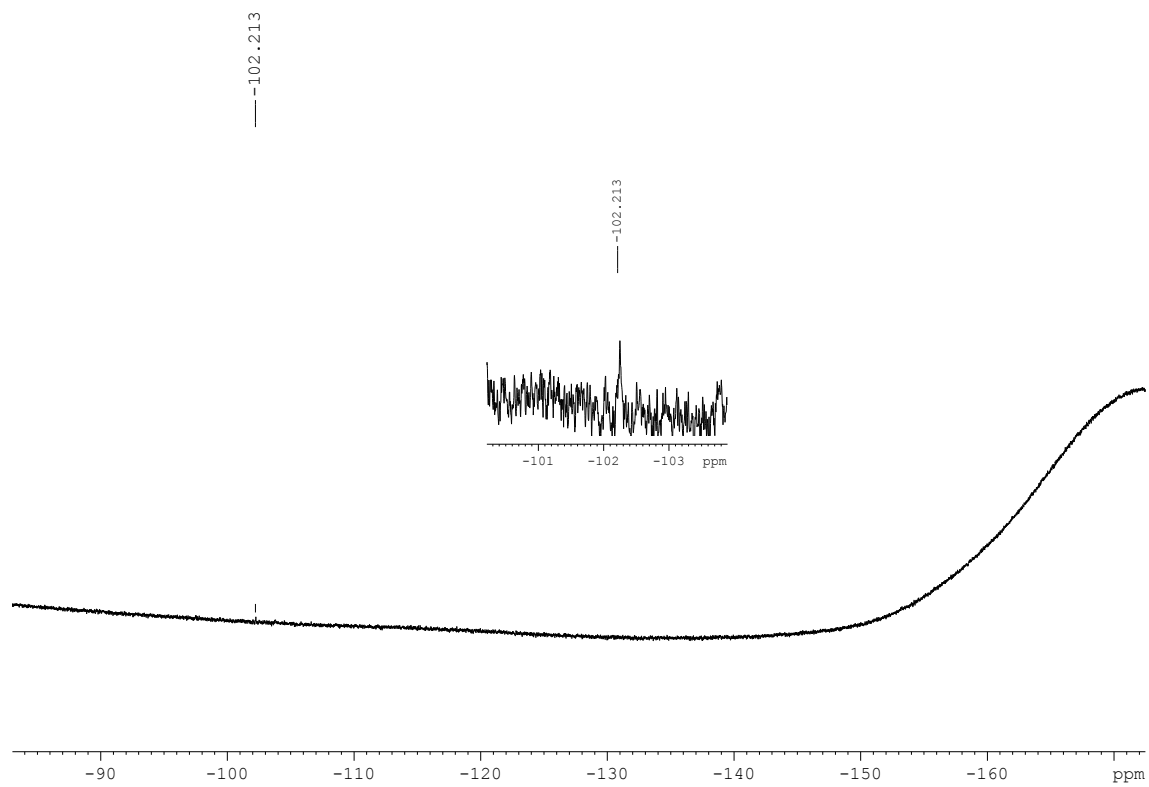



**Figure S32.** Compound 13:  $^1\text{H}$  NMR spectrum ( $\text{CD}_3\text{COOD}/\text{D}_2\text{O}$  700 MHz)

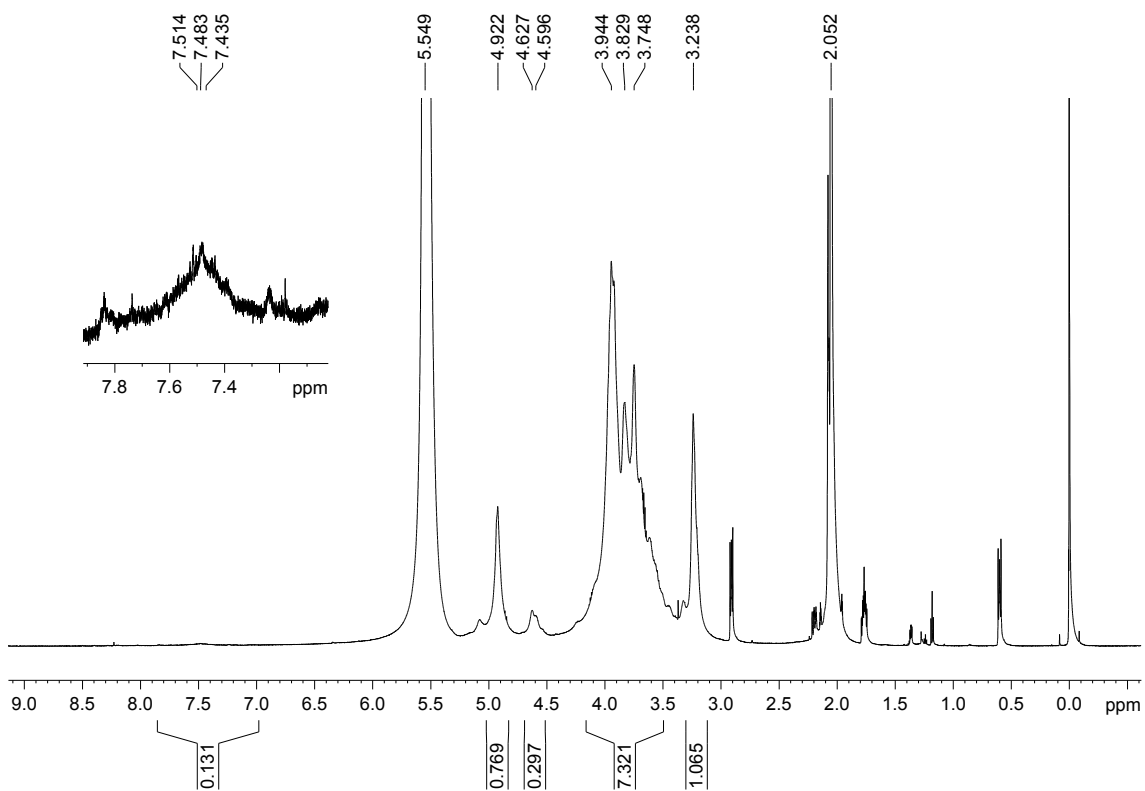

**Figure S33.** Compound 14:  $^1\text{H}$  NMR spectrum ( $\text{CD}_3\text{COOD}/\text{D}_2\text{O}$  700 MHz)

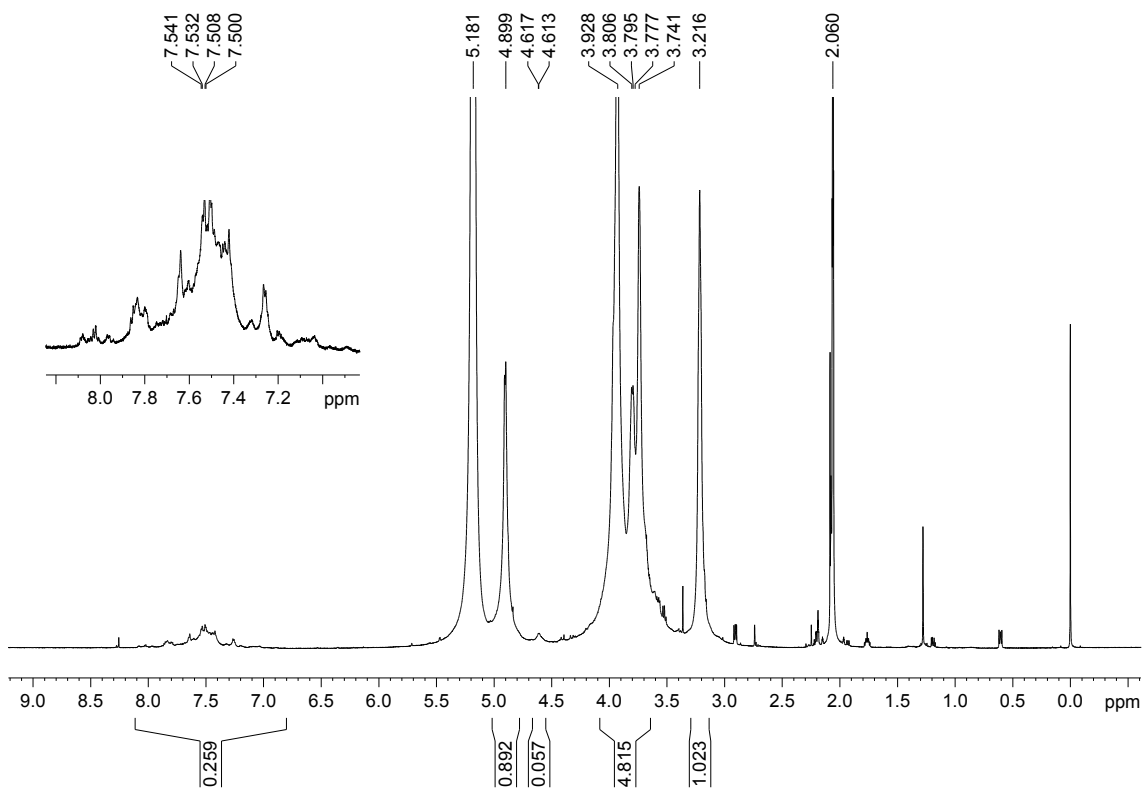

Supplement: c5ra09397j1.pdf [file c5ra09397j1.pdf]
